# Supplementary material
Source: PubMed Central journal article supplement (PMC6994116)
Supplement: jci-130-131234-s299.pdf [file jci-130-131234-s299.pdf]

## SUPPLEMENTARY FIGURE LEGENDS

**Table. S1: List of 30 TCGA tumor types.** The abbreviated TCGA tumor types are annotated.

**Table. S2: List of all Immune synapse genes.** The HLA, co-stimulatory and immune checkpoint genes studied.

**Table. S3: List of Illumina 450 probes for immune synapse genes.** The probeID, the location within the gene locus, the R correlation coefficient between probe  $\beta$ -value and gene expression for all probes used in the study are summarized.

**Table. S4: List of 75 selected probes for PCA.** The probes located within TSS1500, TSS200, 5'UTR within a gene with negative correlation to its expression are selected for PCA.

**Figure S1. The methylation pattern for *HHLA2* and *CD40*.**  $\beta$ -values of methylation probes for TSS1500, TSS200, 5'UTR, body, and 3'UTR of *HHLA2* (A) and *CD40* (B) derived from all tumor samples (blue) and normal adjacent tissues (red) are depicted. The methylation level for each probe is represented by a box-plots. The left most column indicates the presence of CpG-island, while the second column colors indicate where on the gene the probe is located. The genomic location is listed on the left y-axis and the probe id is shown on the right y-axis the probes selected for further analysis is marked with blue color. Heatmap of the correlation coefficient between all the probes within *HHLA2* (C) and *CD40* (D) genes across all tumor types.

**Figure S2. The methylation pattern for *CEACAM1*.** (A)  $\beta$ -values of methylation probes for TSS1500, TSS200, 5'UTR, body, and 3'UTR of *CEACAM1* gene derived from all tumor samples (blue) and normal adjacent tissues (red) are depicted. The methylation level for each probe is represented by a box-plots. The left most column indicates the presence of CpG-island, while

the second column colors indicate where on the gene the probe is located. The genomic location is listed on the left y-axis and the probe id is shown on the right y-axis the probes selected for further analysis is marked with blue color **(B)** Heatmap of the correlation coefficient between all the probes within a gene across all tumor types. **(C)** The average  $\beta$ -values for selected probes within TSS1500, TSS200, and 5'UTR are plotted against gene expression. Each circle represents an individual tissue sample. **(D)** A box plot of average  $\beta$ -values for selected probes from tumor (blue) and normal adjacent tissue (red) are shown.

**Figure S3. The methylation pattern for *LGALS9* (Galectin9).** **(A)**  $\beta$ -values of methylation probes for TSS1500, TSS200, 5'UTR, body, and 3'UTR of *LGALS9* (*Galectin9*) gene derived from all tumor samples (blue) and normal adjacent tissues (red) are depicted. The methylation level for each probe is represented by a box-plots. The left most column indicates the presence of CpG-island, while the second column colors indicate where on the gene the probe is located. The genomic location is listed on the left y-axis and the probe id is shown on the right y-axis the probes selected for further analysis is marked with blue color **(B)** Heatmap of the correlation coefficient between all the probes within a gene across all tumor types. **(C)** The average  $\beta$ -values for selected probes within TSS1500, TSS200, and 5'UTR are plotted against gene expression. Each circle represents an individual tissue sample. **(D)** A box plot of average  $\beta$ -values for selected probes from tumor (blue) and normal adjacent tissue (red) are shown.

**Figure S4. The methylation pattern for *CD274* (PDL1).** **(A)**  $\beta$ -values of methylation probes for TSS1500, TSS200, 5'UTR, body, and 3'UTR of *CD274* (*PDL1*) gene derived from all tumor samples (blue) and normal adjacent tissues (red) are depicted. The methylation level for each probe is represented by a box-plots. The left most column indicates the presence of CpG-island, while the second column colors indicate where on the gene the probe is located. The genomic location is listed on the left y-axis and the probe id is shown on the right y-axis the probes

selected for further analysis is marked with blue color **(B)** Heatmap of the correlation coefficient between all the probes within a gene across all tumor types. **(C)** The average  $\beta$ -values for selected probes within TSS1500, TSS200, and 5'UTR are plotted against gene expression. Each circle represents an individual tissue sample. **(D)** A box plot of average  $\beta$ -values for selected probes from tumor (blue) and normal adjacent tissue (red) are shown.

**Figure S5. The methylation pattern for *PDCD1LG2 (PDL2)*.** **(A)**  $\beta$ -values of methylation probes for TSS1500, TSS200, 5'UTR, body, and 3'UTR of *PDCD1LG2 (PDL2)* gene derived from all tumor samples (blue) and normal adjacent tissues (red) are depicted. The methylation level for each probe is represented by a box-plots. The left most column indicates the presence of CpG-island, while the second column colors indicate where on the gene the probe is located. The genomic location is listed on the left y-axis and the probe id is shown on the right y-axis the probes selected for further analysis is marked with blue color **(B)** Heatmap of the correlation coefficient between all the probes within a gene across all tumor types. **(C)** The average  $\beta$ -values for selected probes within TSS1500, TSS200, and 5'UTR are plotted against gene expression. Each circle represents an individual tissue sample. **(D)** A box plot of average  $\beta$ -values for selected probes from tumor (blue) and normal adjacent tissue (red) are shown.

**Figure S6. The methylation pattern for *C10orf54 (VISTA)*.** **(A)**  $\beta$ -values of methylation probes for TSS1500, TSS200, 5'UTR, body, and 3'UTR of *C10orf54 (VISTA)* gene derived from all tumor samples (blue) and normal adjacent tissues (red) are depicted. The methylation level for each probe is represented by a box-plots. The left most column indicates the presence of CpG-island, while the second column colors indicate where on the gene the probe is located. The genomic location is listed on the left y-axis and the probe id is shown on the right y-axis the probes selected for further analysis is marked with blue color **(B)** Heatmap of the correlation coefficient between all the probes within a gene across all tumor types. **(C)** The average  $\beta$ -

values for selected probes within TSS1500, TSS200, and 5'UTR are plotted against gene expression. Each circle represents an individual tissue sample. (D) A box plot of average  $\beta$ -values for selected probes from tumor (blue) and normal adjacent tissue (red) are shown.

**Figure S7. The methylation pattern for *CD276 (B7-H3)*.** (A)  $\beta$ -values of methylation probes for TSS1500, TSS200, 5'UTR, body, and 3'UTR of *CD276 (B7-H3)* gene derived from all tumor samples (blue) and normal adjacent tissues (red) are depicted. The methylation level for each probe is represented by a box-plots. The left most column indicates the presence of CpG-island, while the second column colors indicate where on the gene the probe is located. The genomic location is listed on the left y-axis and the probe id is shown on the right y-axis the probes selected for further analysis is marked with blue color (B) Heatmap of the correlation coefficient between all the probes within a gene across all tumor types. (C) The average  $\beta$ -values for selected probes within TSS1500, TSS200, and 5'UTR are plotted against gene expression. Each circle represents an individual tissue sample. (D) A box plot of average  $\beta$ -values for selected probes from tumor (blue) and normal adjacent tissue (red) are shown.

**Figure S8. The methylation pattern for *VTCN1 (B7-H4)*.** (A)  $\beta$ -values of methylation probes for TSS1500, TSS200, 5'UTR, body, and 3'UTR of *VTCN1 (B7-H4)* gene derived from all tumor samples (blue) and normal adjacent tissues (red) are depicted. The methylation level for each probe is represented by a box-plots. The left most column indicates the presence of CpG-island, while the second column colors indicate where on the gene the probe is located. The genomic location is listed on the left y-axis and the probe id is shown on the right y-axis the probes selected for further analysis is marked with blue color (B) Heatmap of the correlation coefficient between all the probes within a gene across all tumor types. (C) The average  $\beta$ -values for selected probes within TSS1500, TSS200, and 5'UTR are plotted against gene expression.

Each circle represents an individual tissue sample. **(D)** A box plot of average  $\beta$ -values for selected probes from tumor (blue) and normal adjacent tissue (red) are shown.

**Figure S9. The methylation pattern for *CD86* (B7-2).** **(A)**  $\beta$ -values of methylation probes for TSS1500, TSS200, 5'UTR, body, and 3'UTR of *CD86* gene derived from all tumor samples (blue) and normal adjacent tissues (red) are depicted. The methylation level for each probe is represented by a box-plots. The left most column indicates the presence of CpG-island, while the second column colors indicate where on the gene the probe is located. The genomic location is listed on the left y-axis and the probe id is shown on the right y-axis the probes selected for further analysis is marked with blue color **(B)** Heatmap of the correlation coefficient between all the probes within a gene across all tumor types. **(C)** The average  $\beta$ -values for selected probes within TSS1500, TSS200, and 5'UTR are plotted against gene expression. Each circle represents an individual tissue sample. **(D)** A box plot of average  $\beta$ -values for selected probes from tumor (blue) and normal adjacent tissue (red) are shown.

**Figure S10. The methylation pattern for *CD80* (B7-1).** **(A)**  $\beta$ -values of methylation probes for TSS1500, TSS200, 5'UTR, body, and 3'UTR of *CD80* gene derived from all tumor samples (blue) and normal adjacent tissues (red) are depicted. The methylation level for each probe is represented by a box-plots. The left most column indicates the presence of CpG-island, while the second column colors indicate where on the gene the probe is located. The genomic location is listed on the left y-axis and the probe id is shown on the right y-axis the probes selected for further analysis is marked with blue color **(B)** Heatmap of the correlation coefficient between all the probes within a gene across all tumor types. **(C)** The average  $\beta$ -values for selected probes within TSS1500, TSS200, and 5'UTR are plotted against gene expression.

Each circle represents an individual tissue sample. (D) A box plot of average  $\beta$ -values for selected probes from tumor (blue) and normal adjacent tissue (red) are shown.

**Figure S11. The methylation pattern for *PVR* (CD155).** (A)  $\beta$ -values of methylation probes for TSS1500, TSS200, 5'UTR, body, and 3'UTR of *PVR* gene derived from all tumor samples (blue) and normal adjacent tissues (red) are depicted. The methylation level for each probe is represented by a box-plots. The left most column indicates the presence of CpG-island, while the second column colors indicate where on the gene the probe is located. The genomic location is listed on the left y-axis and the probe id is shown on the right y-axis the probes selected for further analysis is marked with blue color (B) Heatmap of the correlation coefficient between all the probes within a gene across all tumor types. (C) The average  $\beta$ -values for selected probes within TSS1500, TSS200, and 5'UTR are plotted against gene expression. Each circle represents an individual tissue sample. (D) A box plot of average  $\beta$ -values for selected probes from tumor (blue) and normal adjacent tissue (red) are shown.

**Figure S12. The methylation pattern for *LGALS3* (Galectin3).** (A)  $\beta$ -values of methylation probes for TSS1500, TSS200, 5'UTR, body, and 3'UTR of *LGALS3* (*Galectin3*) gene derived from all tumor samples (blue) and normal adjacent tissues (red) are depicted. The methylation level for each probe is represented by a box-plots. The left most column indicates the presence of CpG-island, while the second column colors indicate where on the gene the probe is located. The genomic location is listed on the left y-axis and the probe id is shown on the right y-axis the probes selected for further analysis is marked with blue color (B) Heatmap of the correlation coefficient between all the probes within a gene across all tumor types. (C) The average  $\beta$ -values for selected probes within TSS1500, TSS200, and 5'UTR are plotted against gene

expression. Each circle represents an individual tissue sample. **(D)** A box plot of average  $\beta$ -values for selected probes from tumor (blue) and normal adjacent tissue (red) are shown.

**Figure S13. The methylation pattern for *TNFSF14 (LIGHT)*.** **(A)**  $\beta$ -values of methylation probes for TSS1500, TSS200, 5'UTR, body, and 3'UTR of *TNFSF14 (LIGHT)* gene derived from all tumor samples (blue) and normal adjacent tissues (red) are depicted. The methylation level for each probe is represented by a box-plots. The left most column indicates the presence of CpG-island, while the second column colors indicate where on the gene the probe is located. The genomic location is listed on the left y-axis and the probe id is shown on the right y-axis the probes selected for further analysis is marked with blue color **(B)** Heatmap of the correlation coefficient between all the probes within a gene across all tumor types. **(C)** The average  $\beta$ -values for selected probes within TSS1500, TSS200, and 5'UTR are plotted against gene expression. Each circle represents an individual tissue sample. **(D)** A box plot of average  $\beta$ -values for selected probes from tumor (blue) and normal adjacent tissue (red) are shown.

**Figure S14. The methylation pattern for *TNFSF4 (OX40L)*.** **(A)**  $\beta$ -values of methylation probes for TSS1500, TSS200, 5'UTR, body, and 3'UTR of *TNFSF4 (OX40L)* gene derived from all tumor samples (blue) and normal adjacent tissues (red) are depicted. The methylation level for each probe is represented by a box-plots. The left most column indicates the presence of CpG-island, while the second column colors indicate where on the gene the probe is located. The genomic location is listed on the left y-axis and the probe id is shown on the right y-axis the probes selected for further analysis is marked with blue color **(B)** Heatmap of the correlation coefficient between all the probes within a gene across all tumor types. **(C)** The average  $\beta$ -values for selected probes within TSS1500, TSS200, and 5'UTR are plotted against gene

expression. Each circle represents an individual tissue sample. **(D)** A box plot of average  $\beta$ -values for selected probes from tumor (blue) and normal adjacent tissue (red) are shown.

**Figure S15. The methylation pattern for *TNFSF9 (CD173L)*.** **(A)**  $\beta$ -values of methylation probes for TSS1500, TSS200, 5'UTR, body, and 3'UTR of *TNFSF9 (CD173L)* gene derived from all tumor samples (blue) and normal adjacent tissues (red) are depicted. The methylation level for each probe is represented by a box-plots. The left most column indicates the presence of CpG-island, while the second column colors indicate where on the gene the probe is located. The genomic location is listed on the left y-axis and the probe id is shown on the right y-axis the probes selected for further analysis is marked with blue color **(B)** Heatmap of the correlation coefficient between all the probes within a gene across all tumor types. **(C)** The average  $\beta$ -values for selected probes within TSS1500, TSS200, and 5'UTR are plotted against gene expression. Each circle represents an individual tissue sample. **(D)** A box plot of average  $\beta$ -values for selected probes from tumor (blue) and normal adjacent tissue (red) are shown.

**Figure S16. The methylation pattern for *HLA-A*.** **(A)**  $\beta$ -values of methylation probes for TSS1500, TSS200, 5'UTR, body, and 3'UTR of *HLA-A* gene derived from all tumor samples (blue) and normal adjacent tissues (red) are depicted. The methylation level for each probe is represented by a box-plots. The left most column indicates the presence of CpG-island, while the second column colors indicate where on the gene the probe is located. The genomic location is listed on the left y-axis and the probe id is shown on the right y-axis the probes selected for further analysis is marked with blue color **(B)** Heatmap of the correlation coefficient between all the probes within a gene across all tumor types. **(C)** The average  $\beta$ -values for selected probes within TSS1500, TSS200, and 5'UTR are plotted against gene expression.



Each circle represents an individual tissue sample. (D) A box plot of average  $\beta$ -values for selected probes from tumor (blue) and normal adjacent tissue (red) are shown.

**Figure S17. Correlation of PC1 and PC2 with CSG and ICG.** (A) A scatter plot of PC1 score vs. average  $\beta$ -values of CSG probes is shown. (B) A scatter plot of PC2 score vs. average  $\beta$ -values of ICG probes is shown. (C) The PCA loadings of each variable, CpG-probes, for CSG probes (Blue circles) and ICG probes (Red squares) are depicted. A box plot of average  $\beta$ -values of CSG probes (C) and average  $\beta$ -values of ICG probes (D) for tumor (blue) and normal adjacent tissue (red) are compared across histologic types. \*  $p < 0.05$ , \*\*  $p < 0.01$ , \*\*\*  $p < 0.001$ , \*\*\*\*  $p < 0.0001$  by t-test.

**Figure S18. PLS regression model in melanoma.** The PLS model was developed by analysis of patients with longer DSS vs. shorter DSS in the training set in melanoma. Kaplan-Meier curves for DSS of the validation melanoma cohort is depicted based on the high vs. low predicted response by median.

**Figure S19. PC1 predicts OS and DSS in immunogenic cancers.** (A) Kaplan-Meier curves for OS of melanoma patients with high, intermediate, and low tertile of PC1 score are shown. (B, C) Kaplan-Meier curves for OS (B) and DSS (C) of lung squamous cell carcinoma with high, intermediate and low tertile of PC1 score are shown. (D, E) Kaplan-Meier curves for OS (D) and DSS (E) of lung adenocarcinoma patients with high, intermediate, and low tertile of PC1 score are shown. (F, G) Kaplan-Meier curves for OS of uterine cancer patients with MSI (F) or without MSI (G) with high, intermediate, and low tertials of PC1 score are shown.

**Figure S20. PC2 predicts OS and DSS in immunogenic cancers.** (A, B) Kaplan-Meier curves for OS (B) and DSS (C) of head and neck squamous cell carcinoma with high, intermediate and low tertile of PC2 score are shown. (C, D) Kaplan-Meier curves for OS (C) and DSS (D) of renal

clear cell carcinoma patients with high, intermediate, and low tertile of PC1 score are shown. (E, F) Kaplan-Meier curves for OS (E) and DSS (F) of renal papillary carcinoma patients with high, intermediate, and low tertile of PC1 score are shown.

# Supplementary Figure 1

**A**

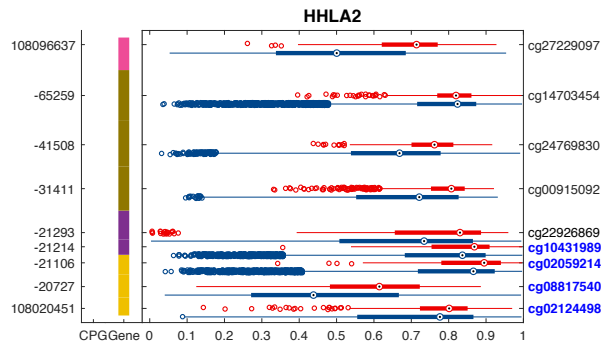

**C**

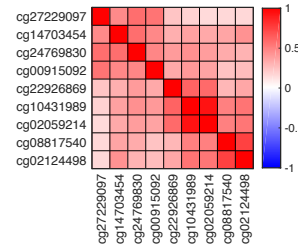

**B**

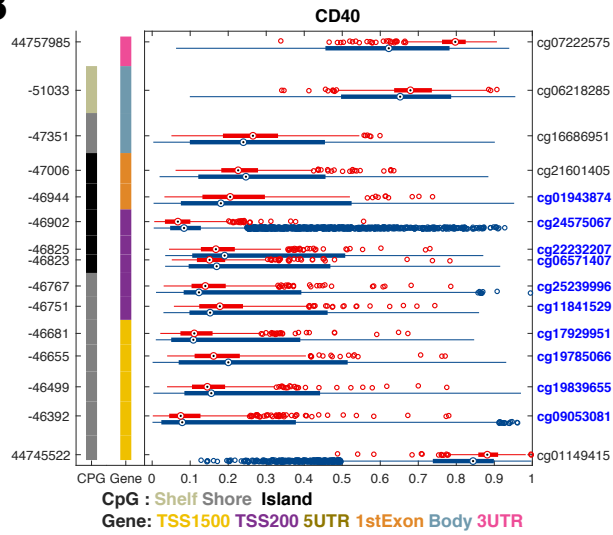

**D**

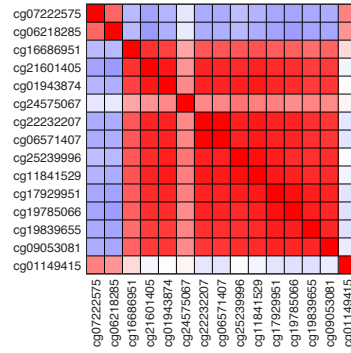

A

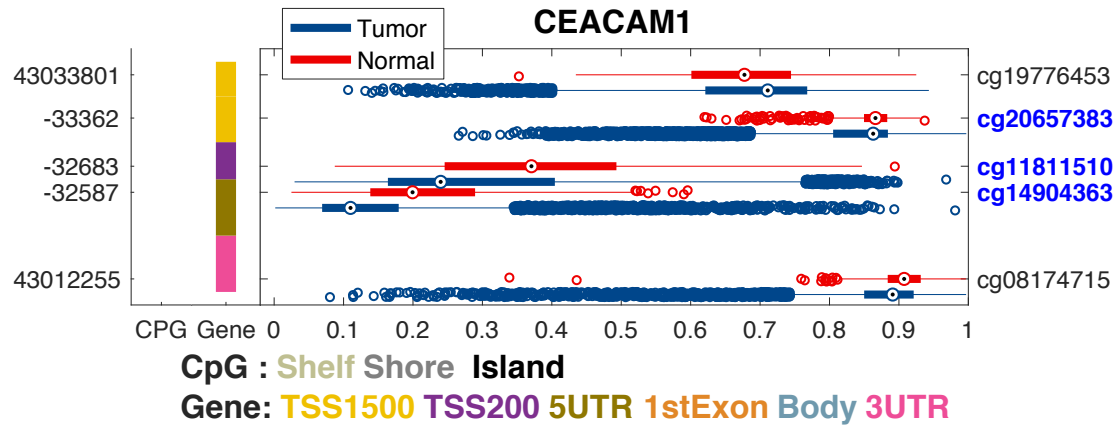

B

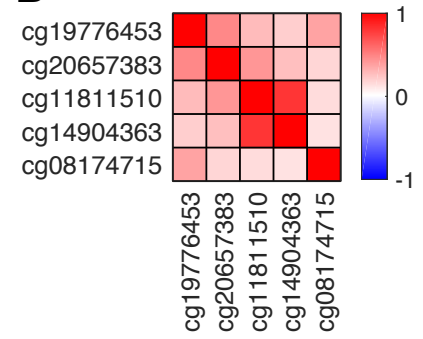

C

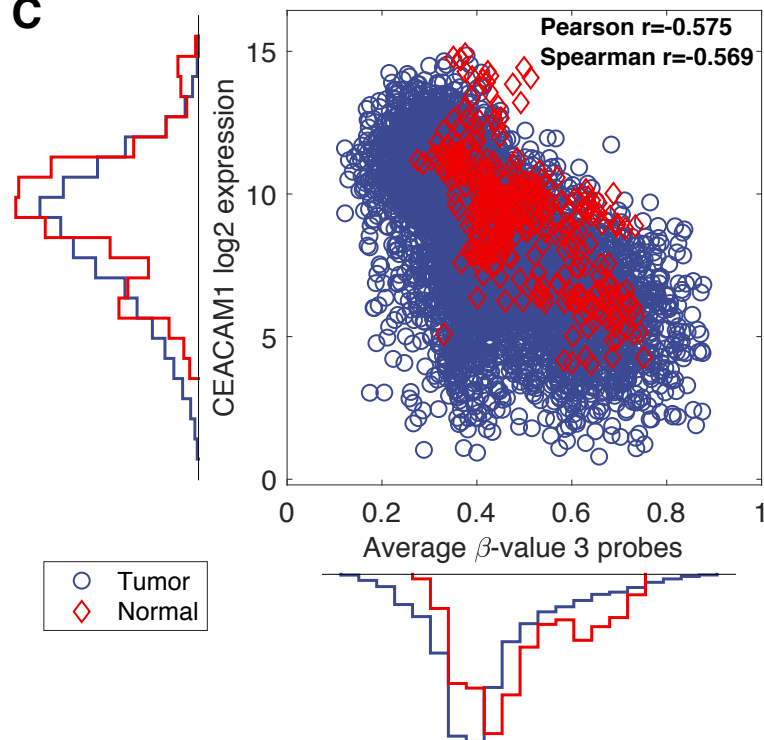

D

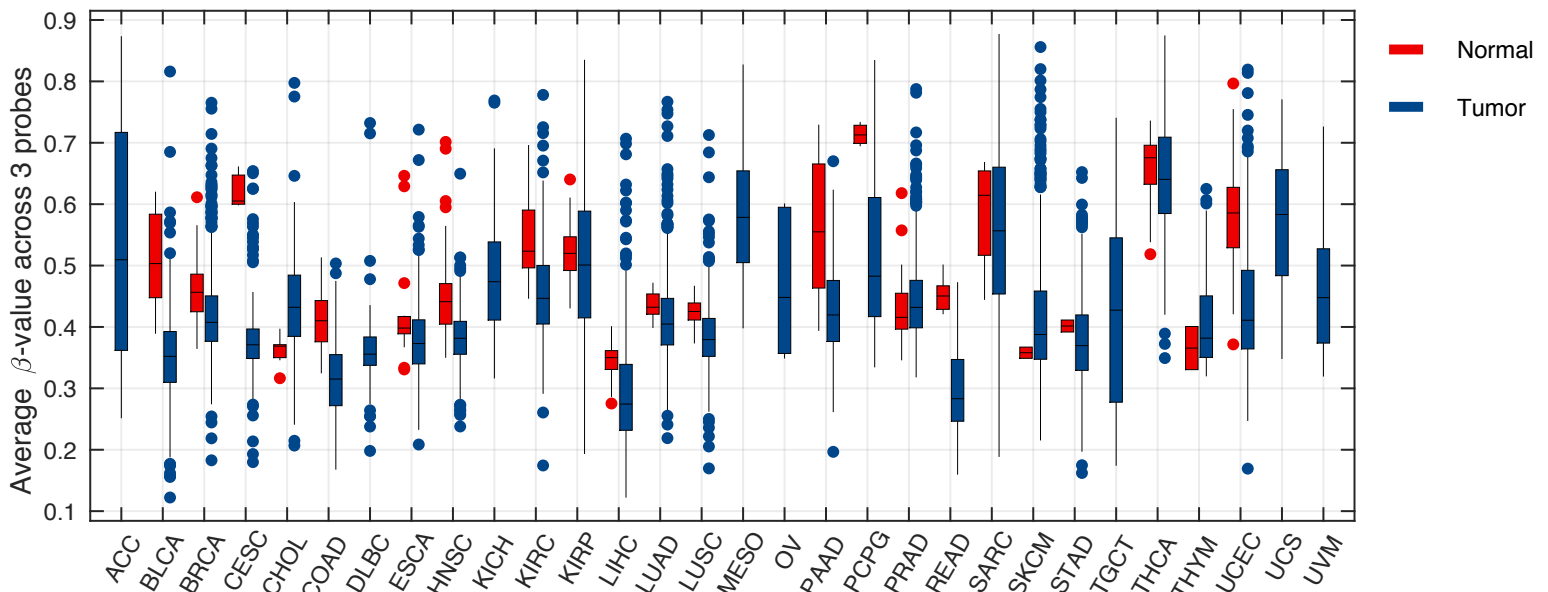

# Supplementary Figure 3 LGALS9 (Galectin 9)

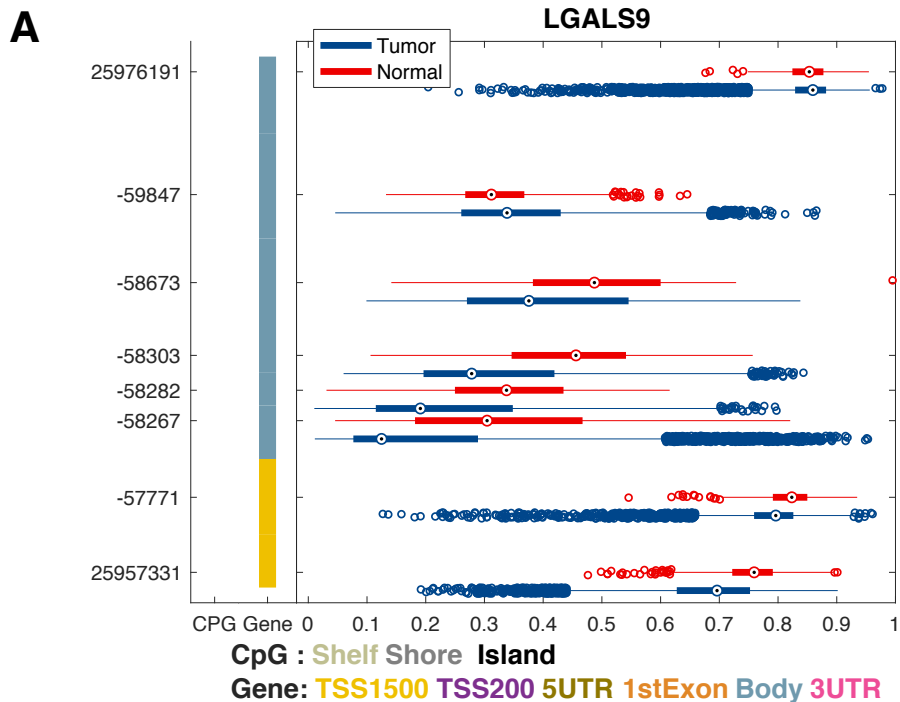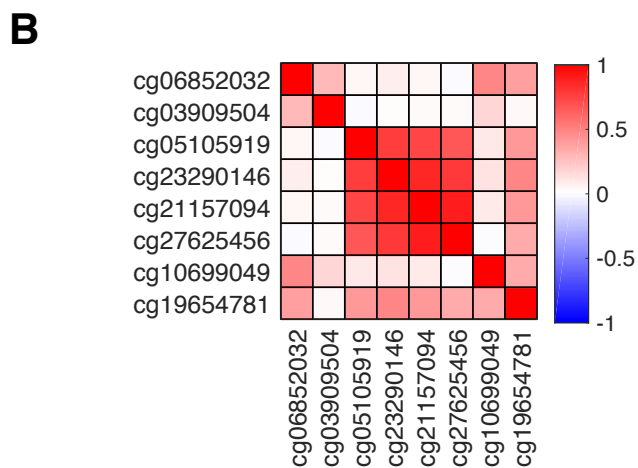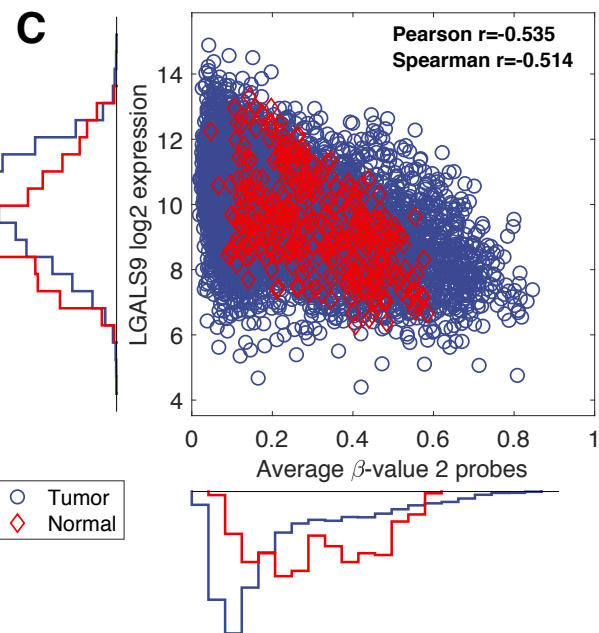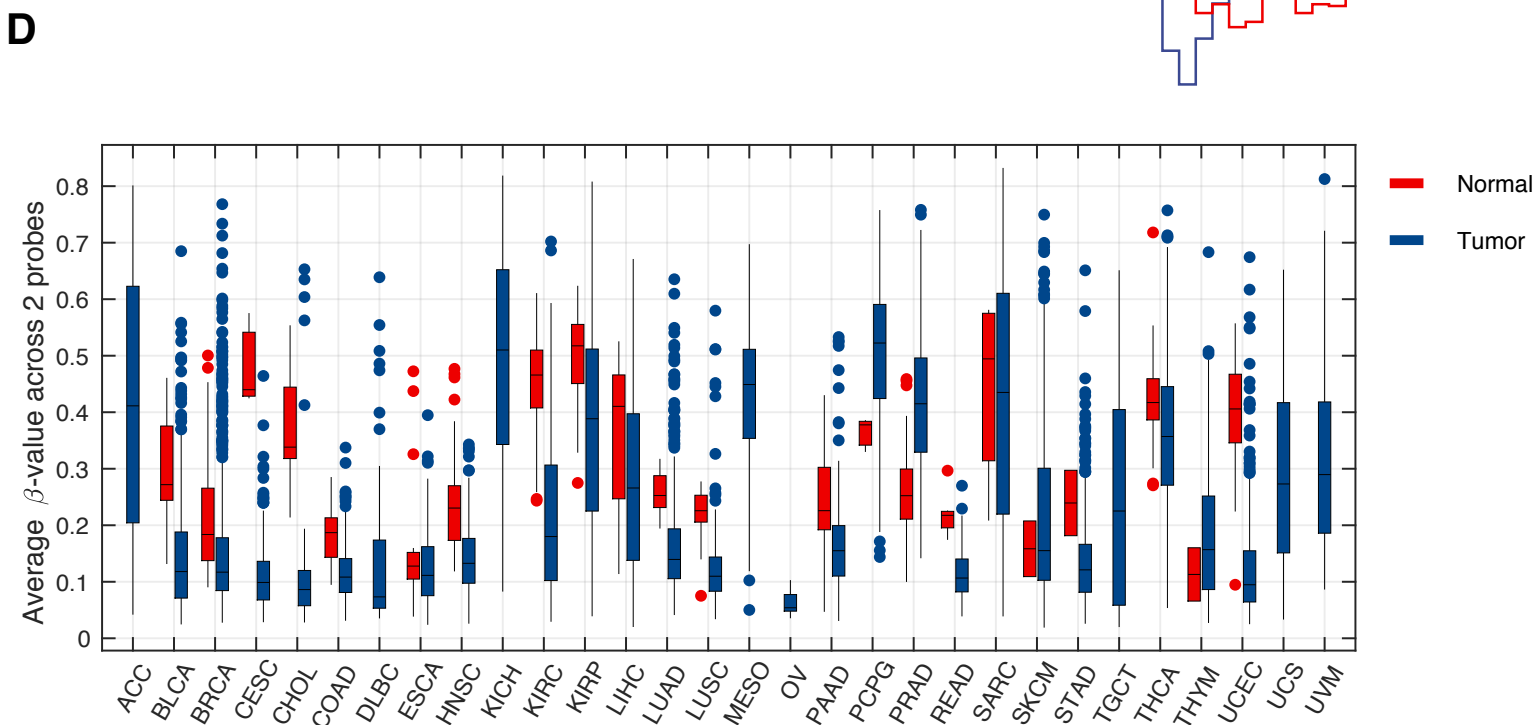

A

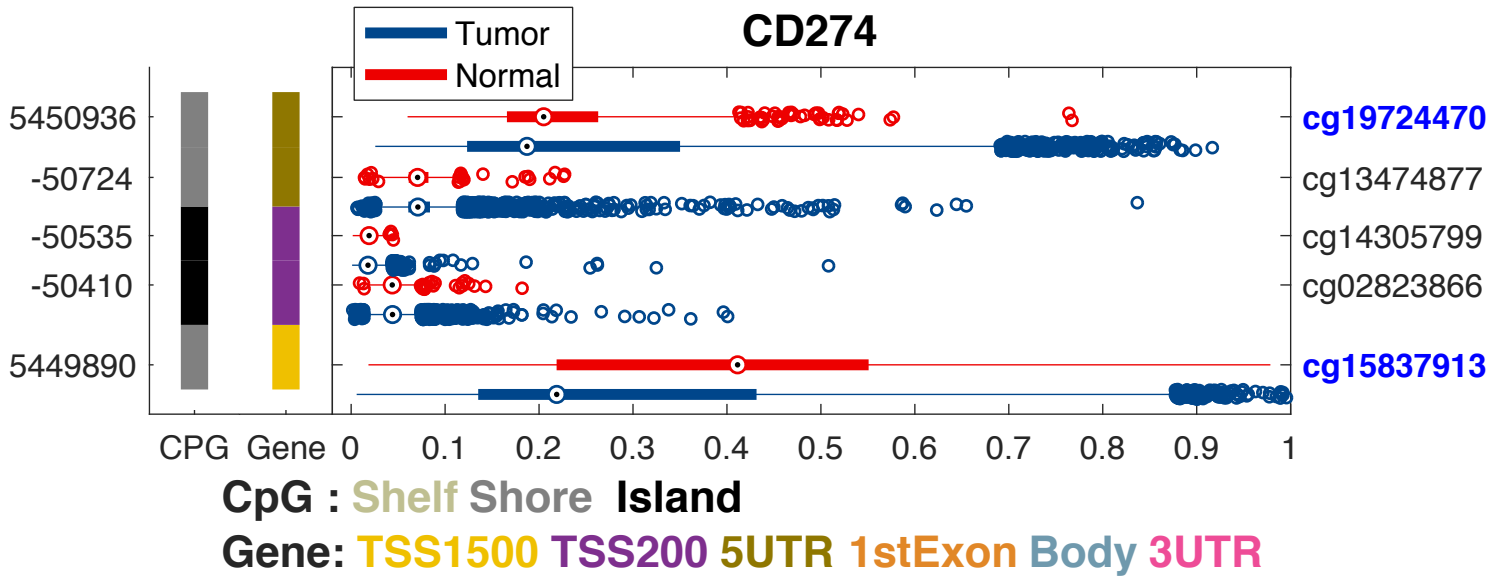

B

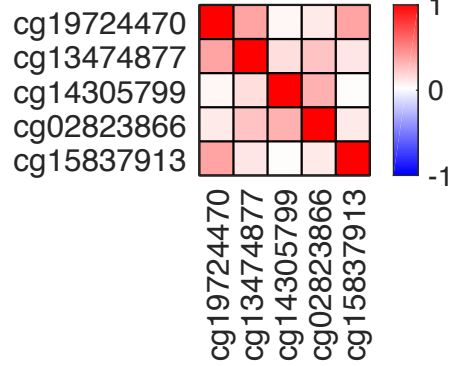

C

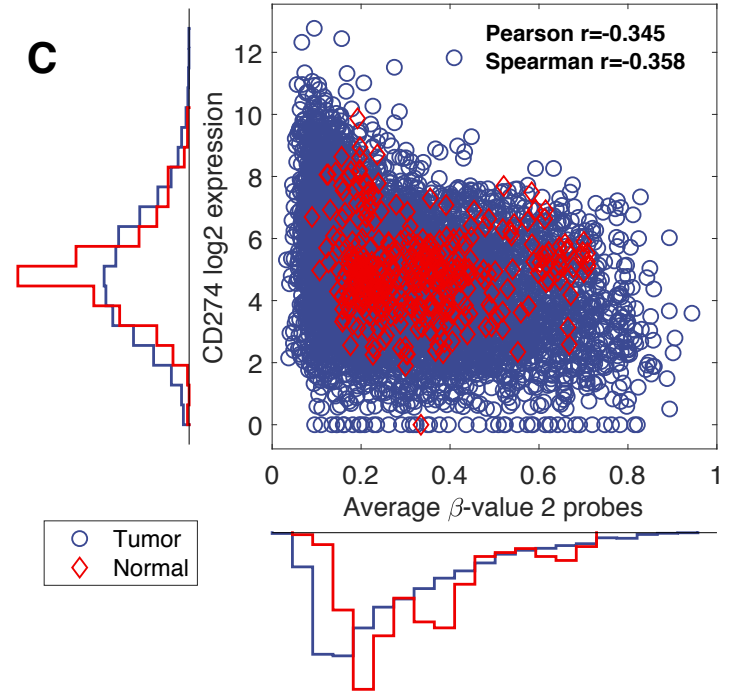

D

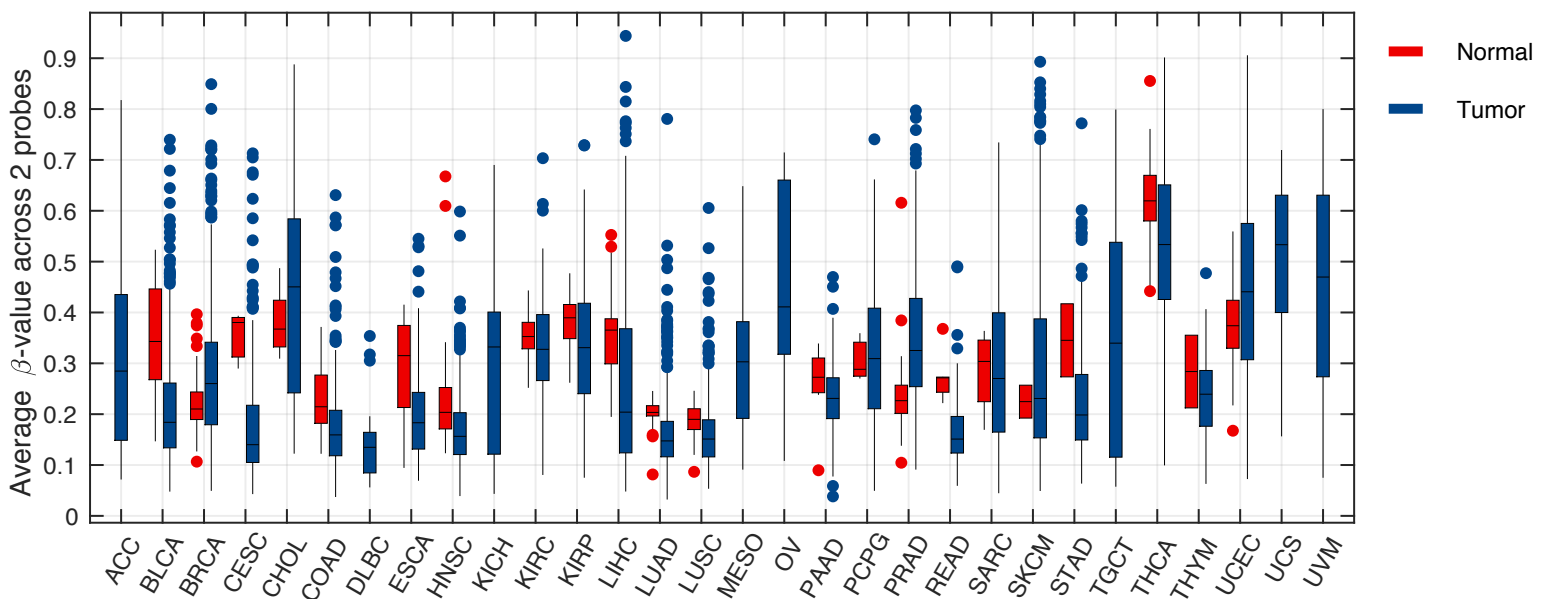

**A**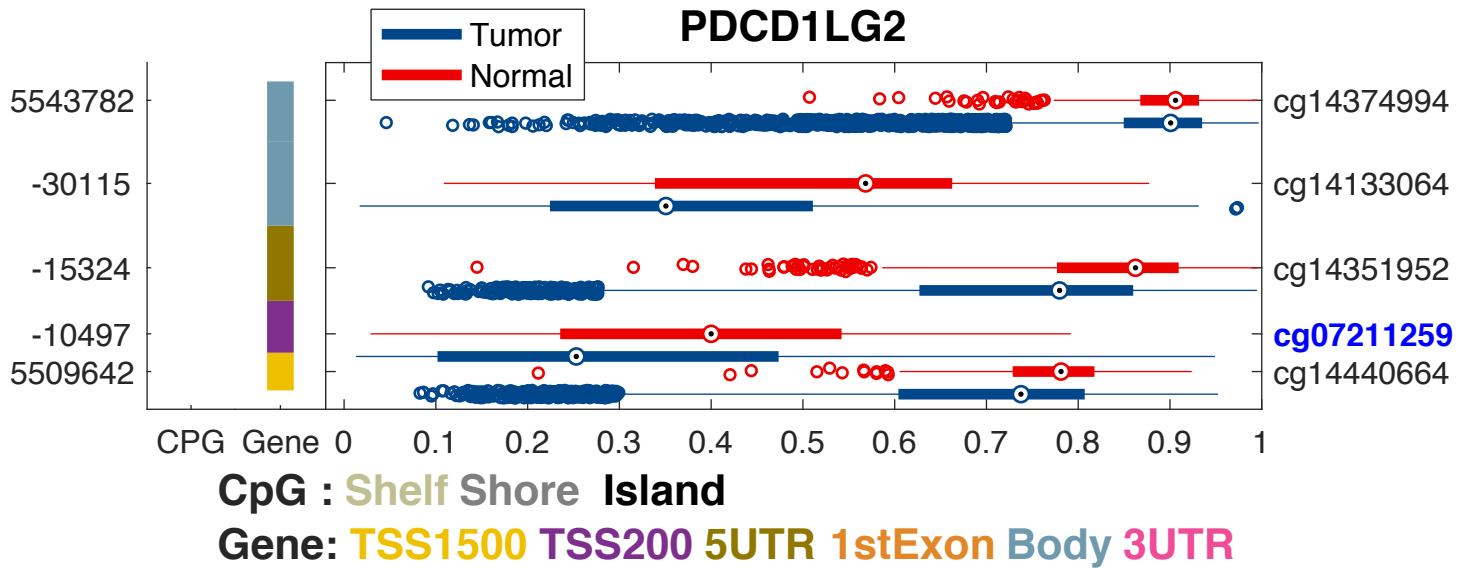**B**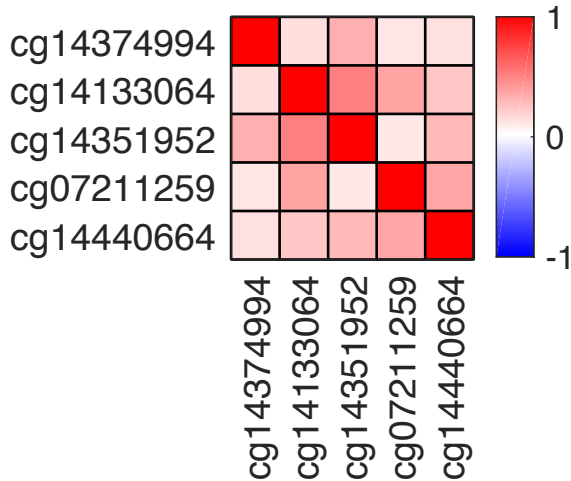**C**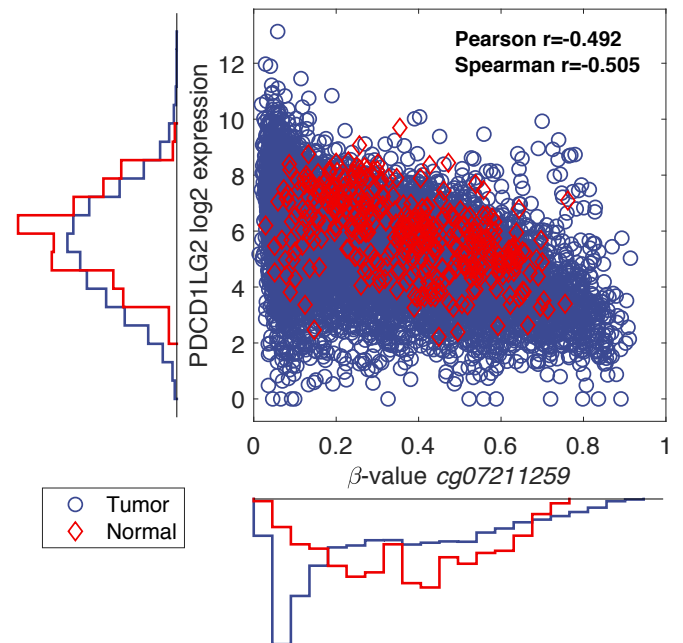**D**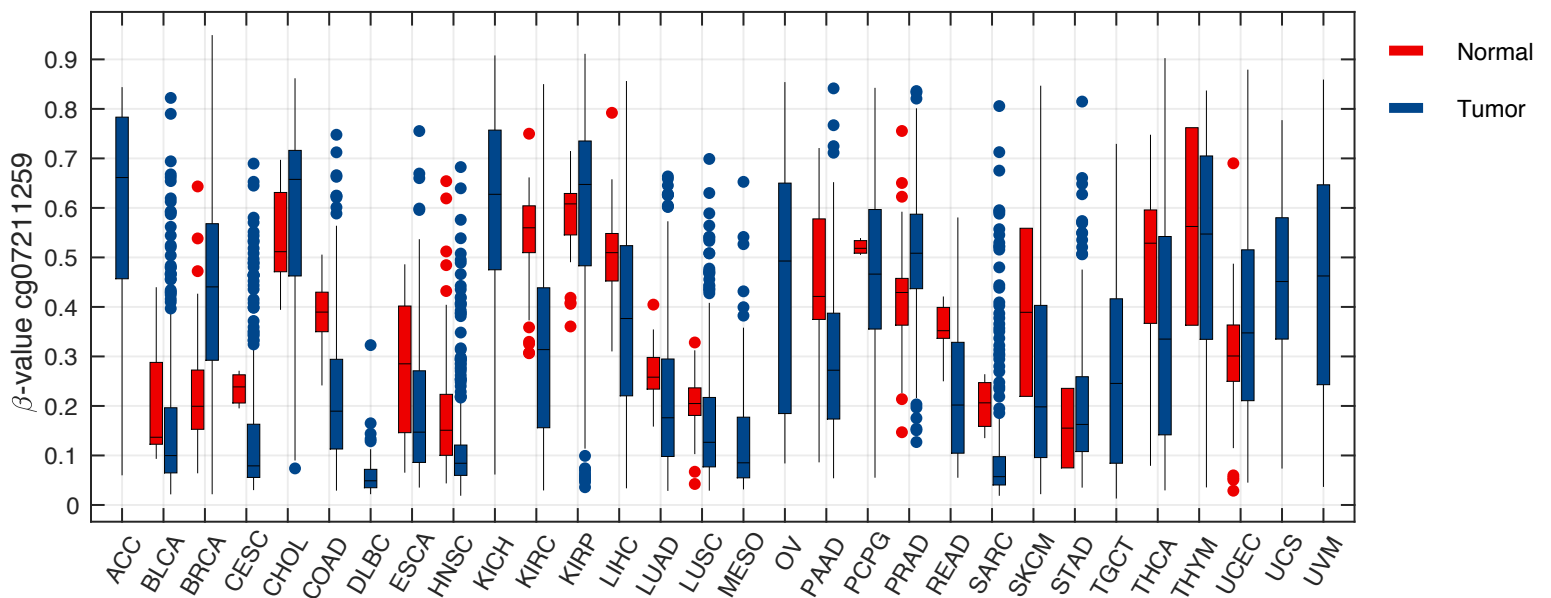

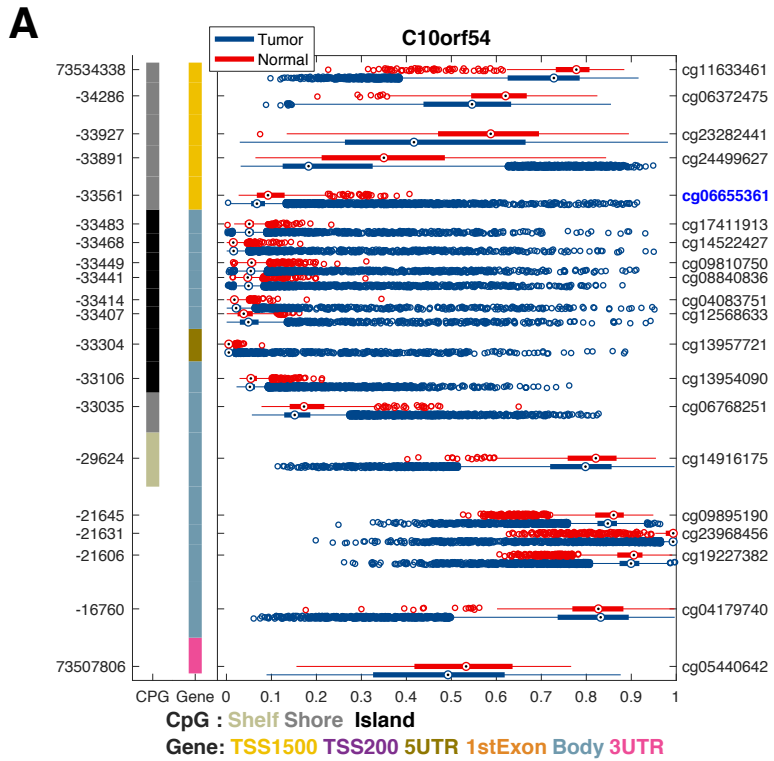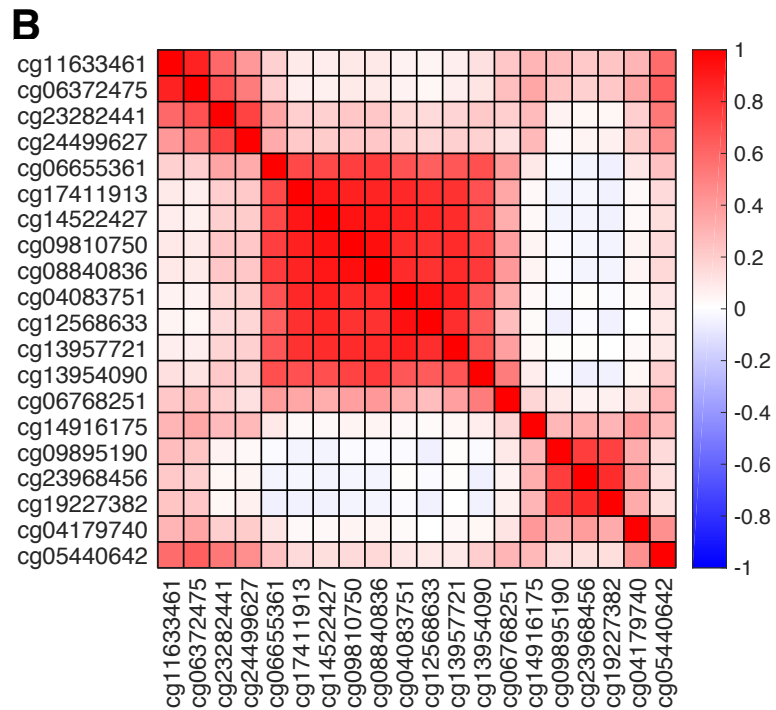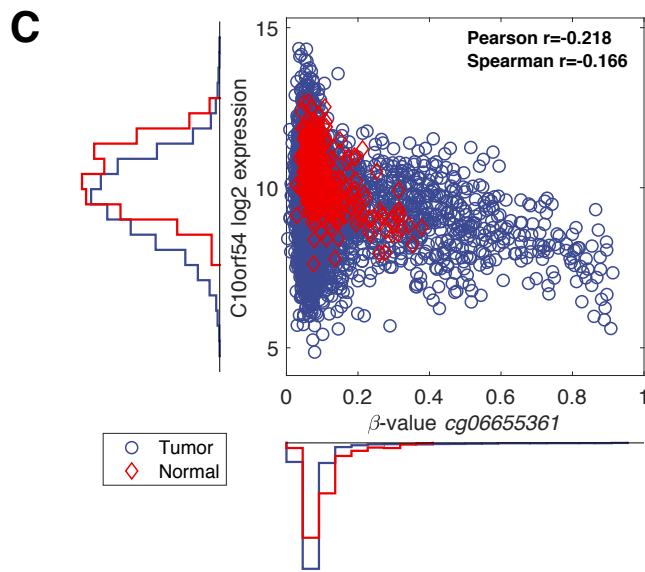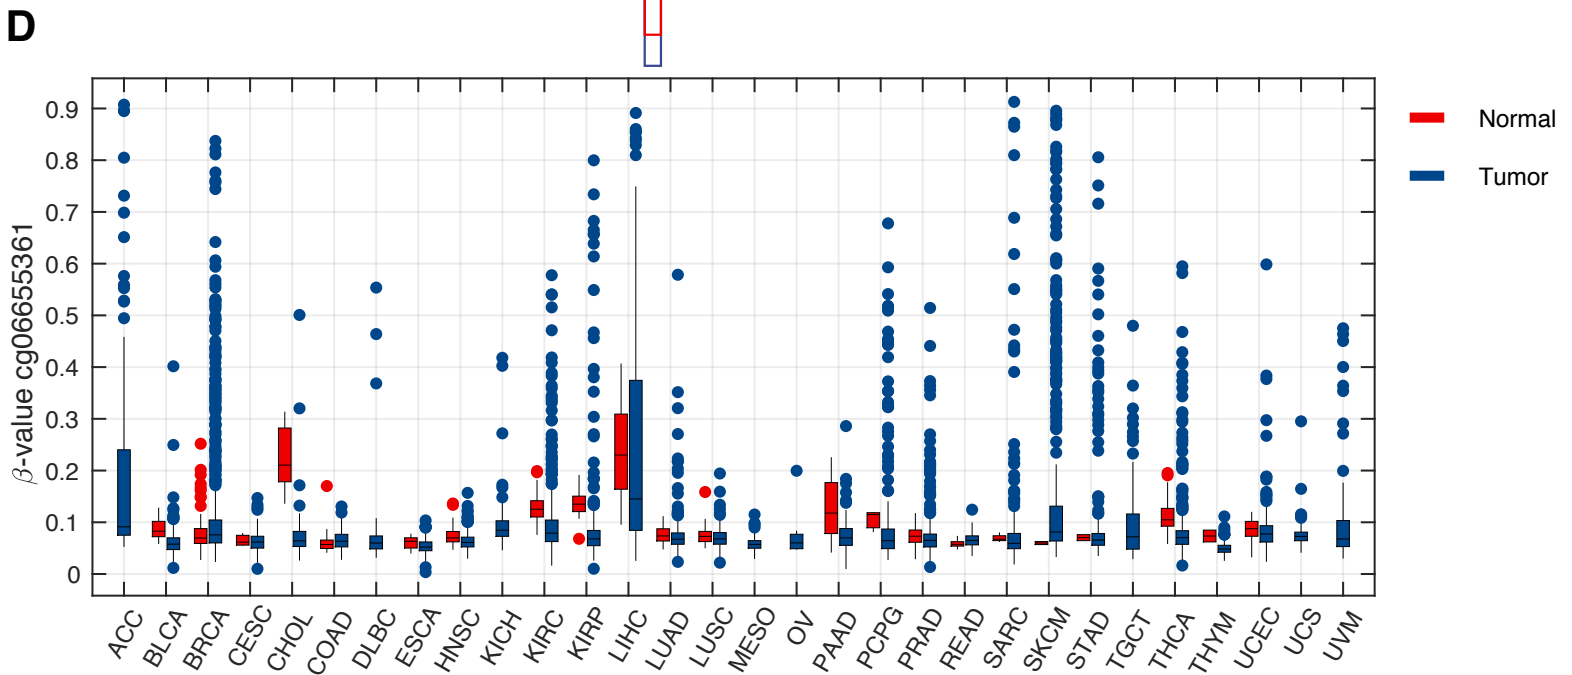



A

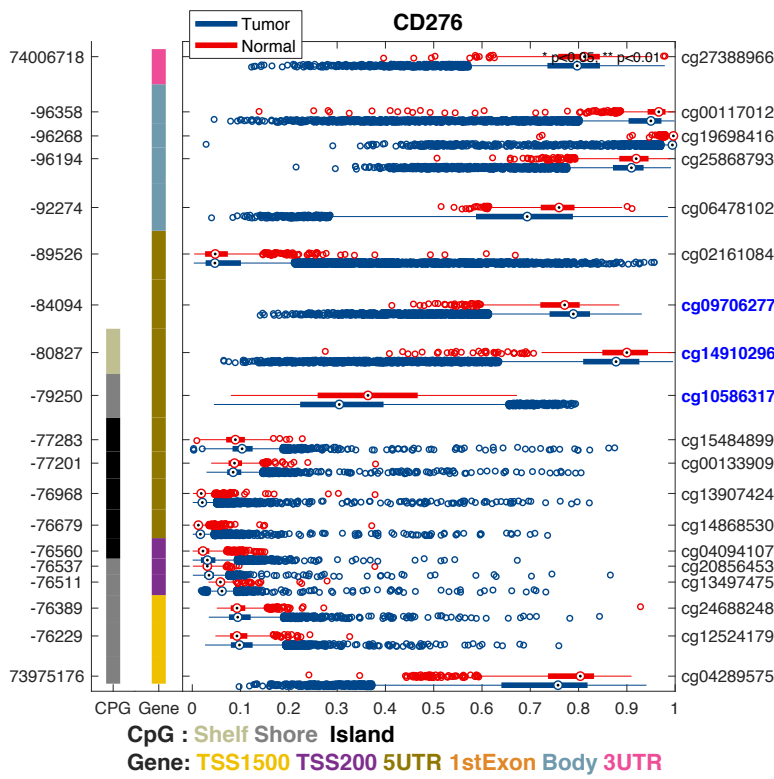

B

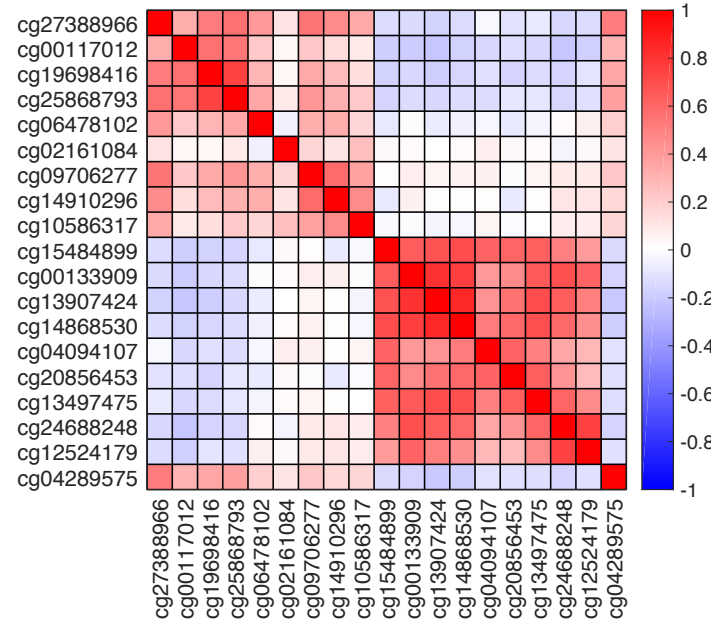

C

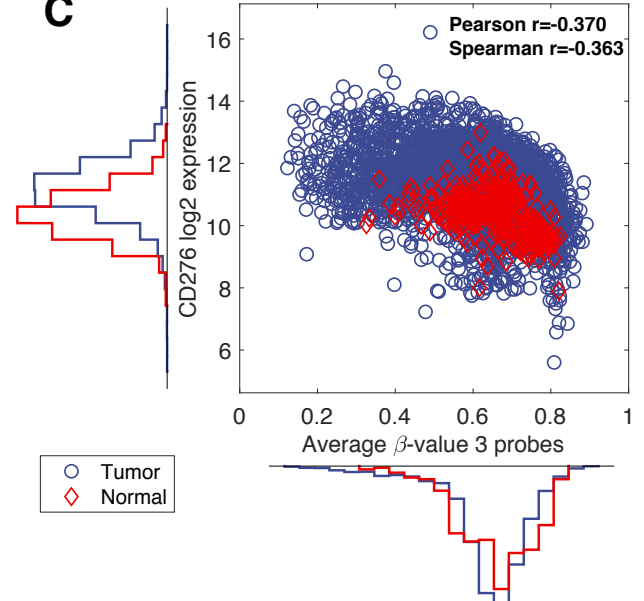

D

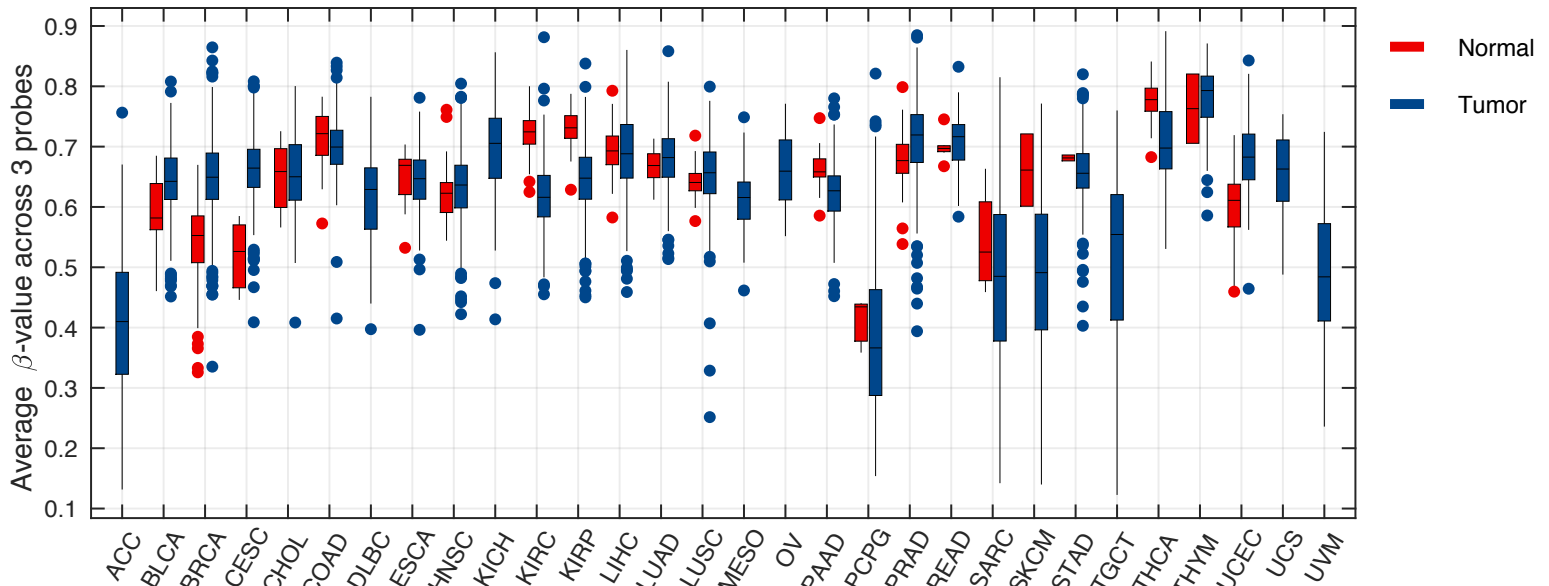

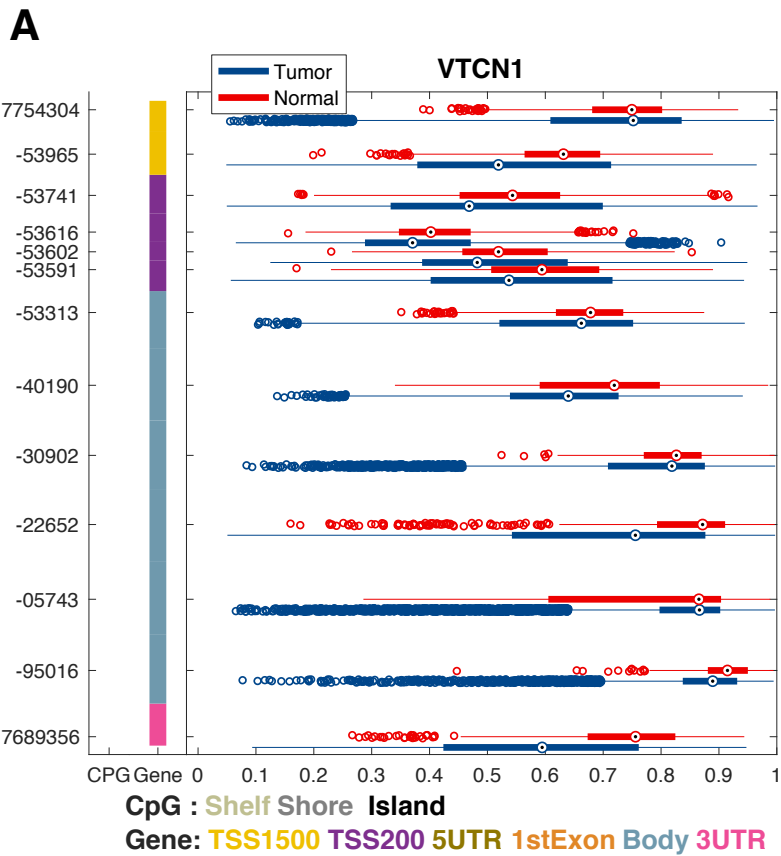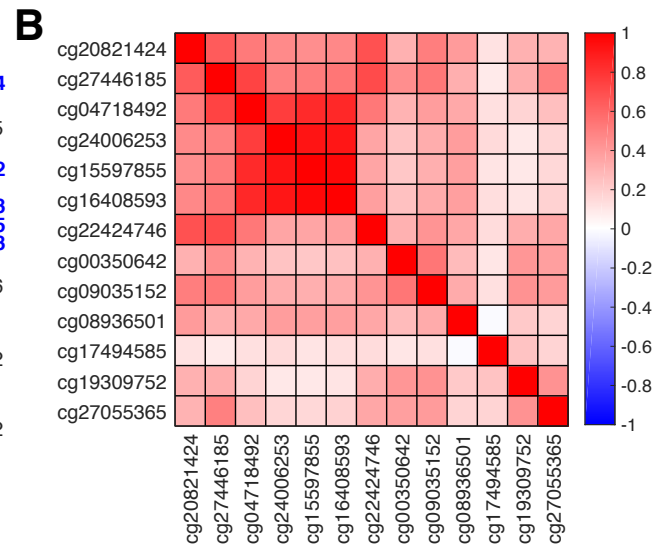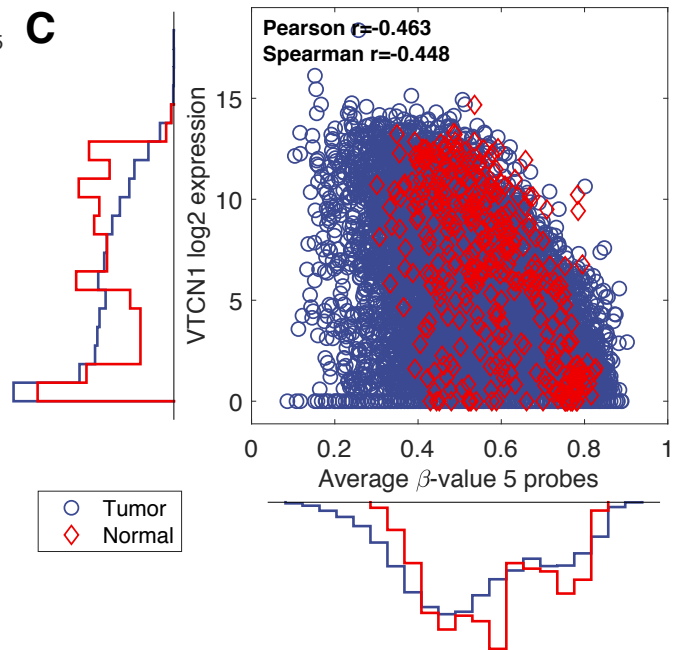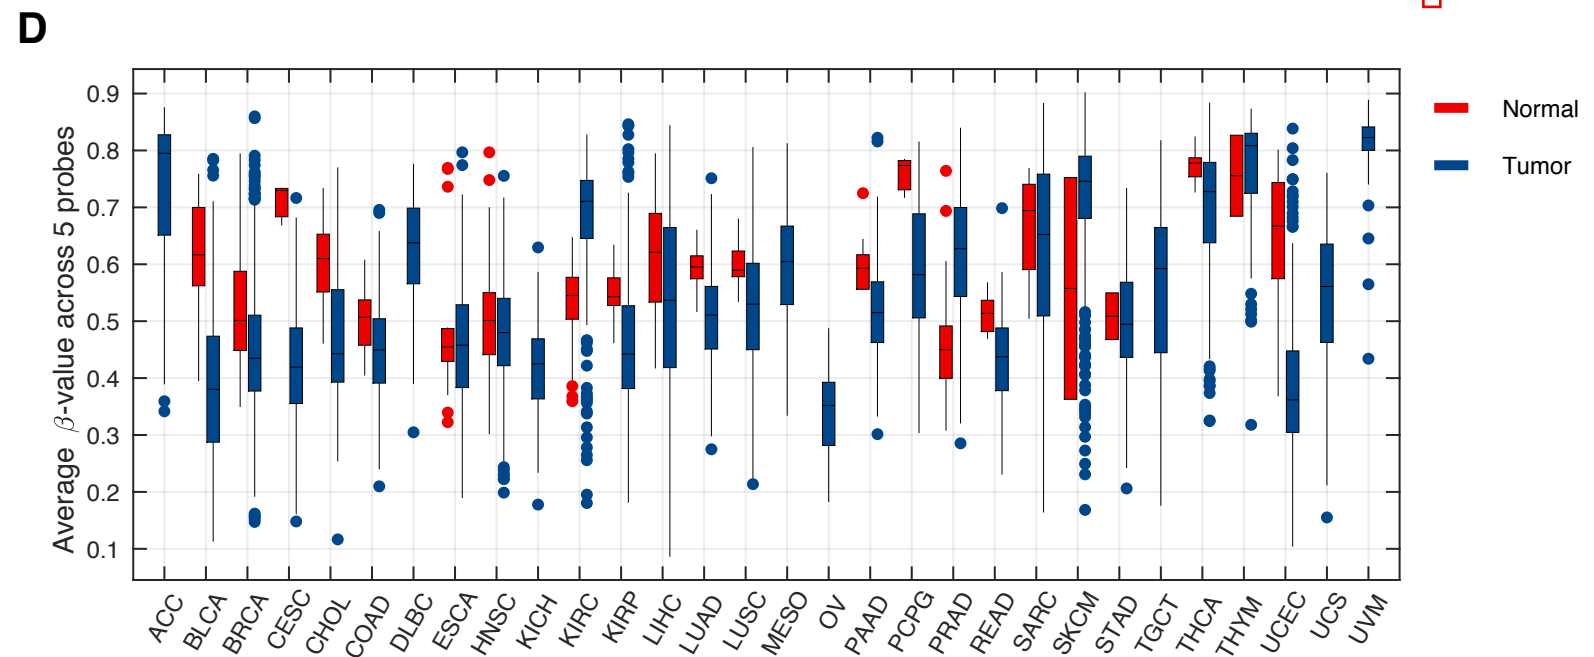

A

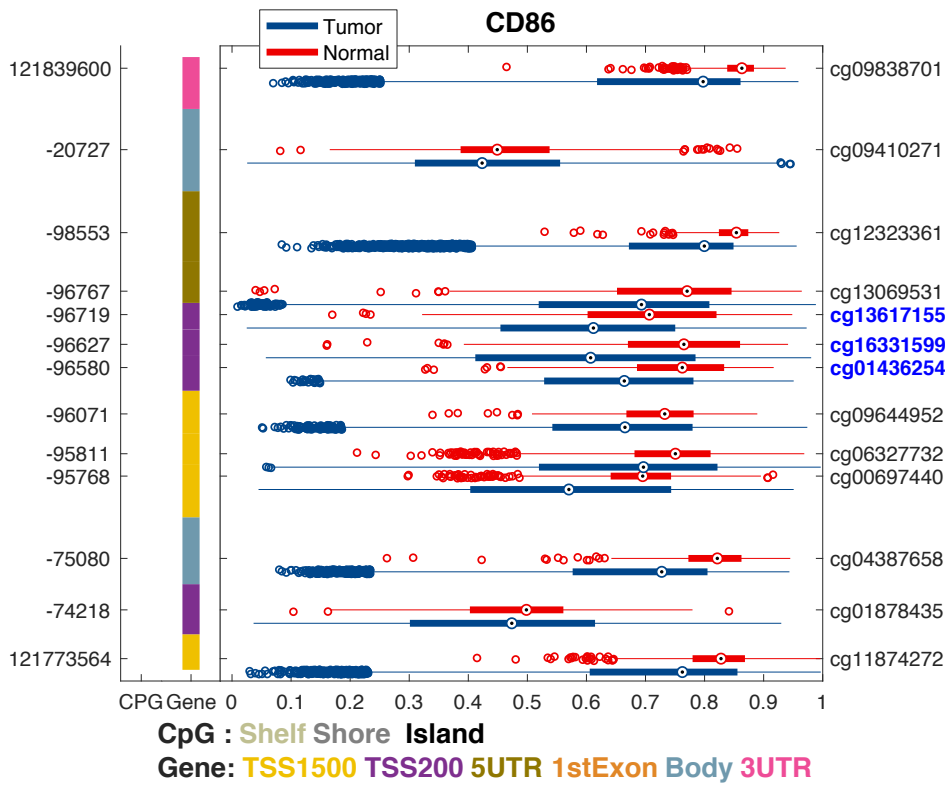

B

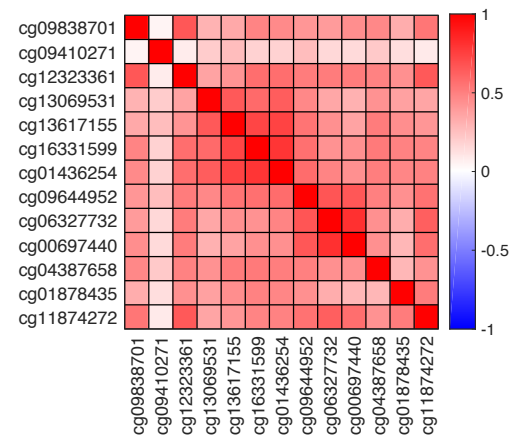

C

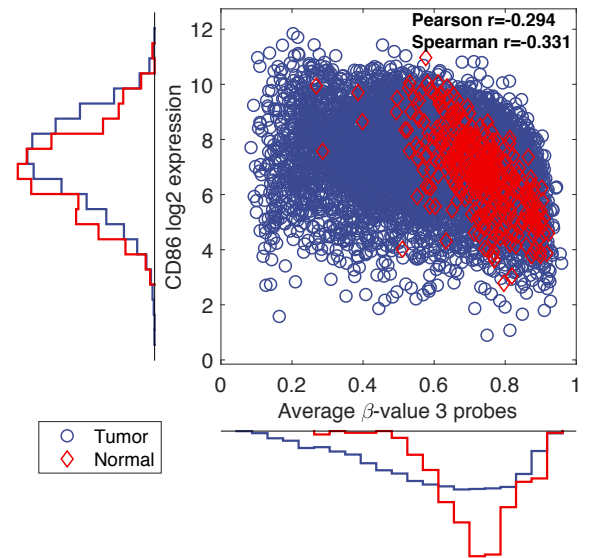

D

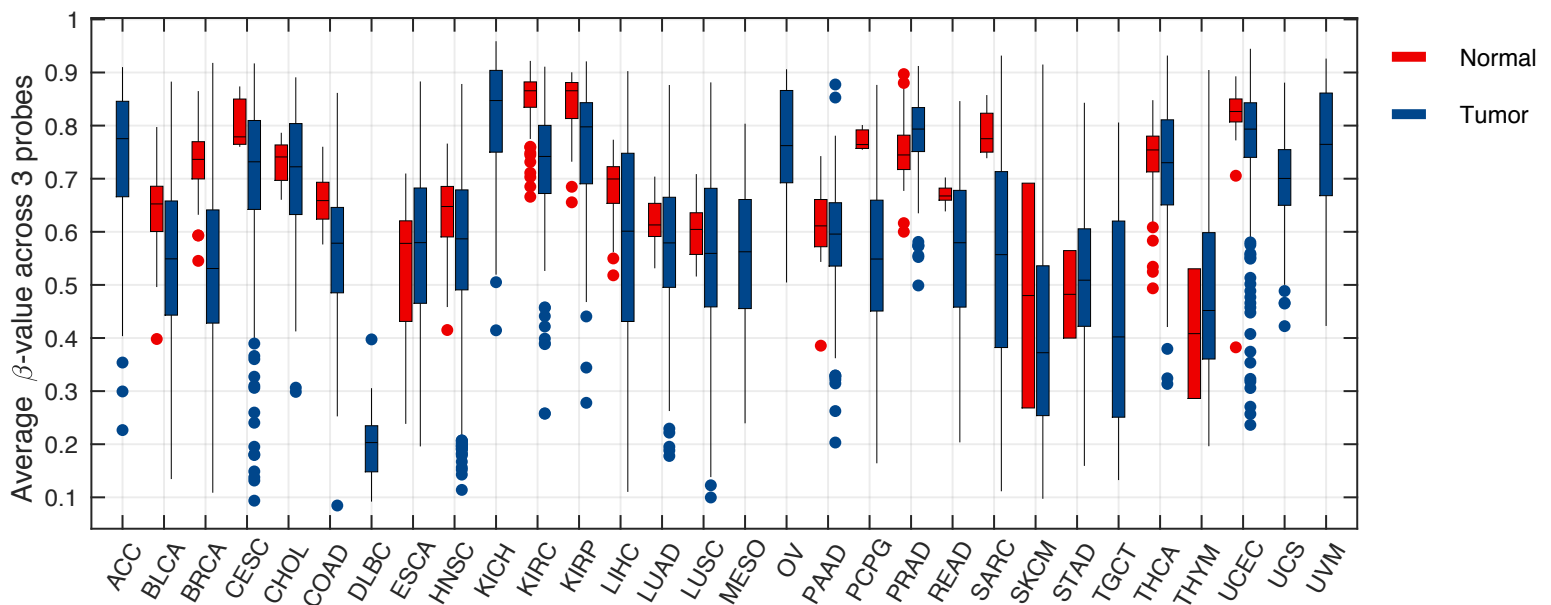

A

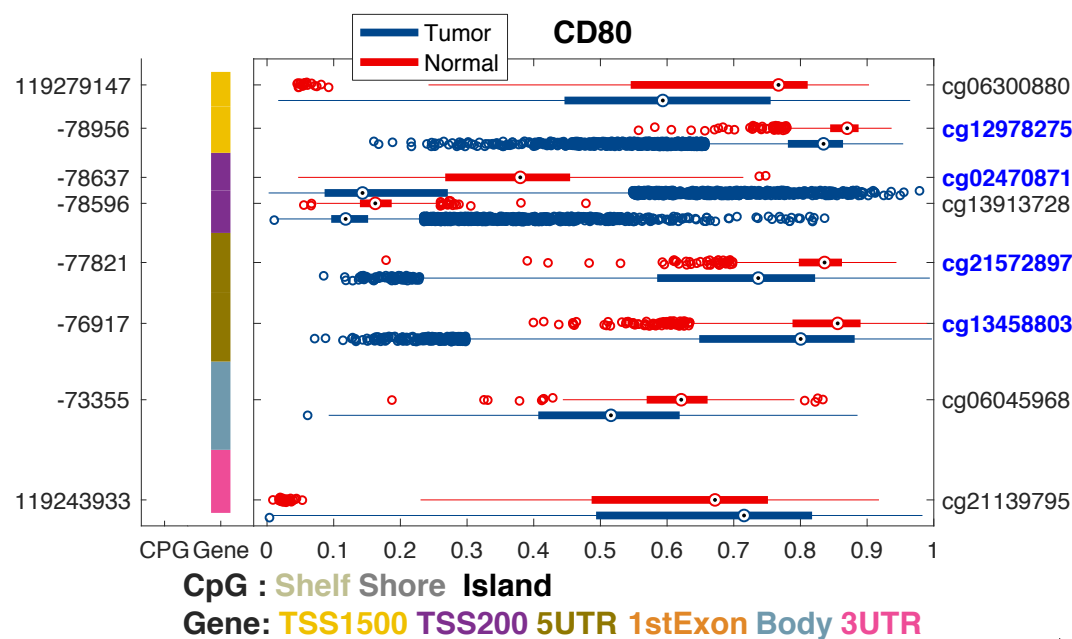

B

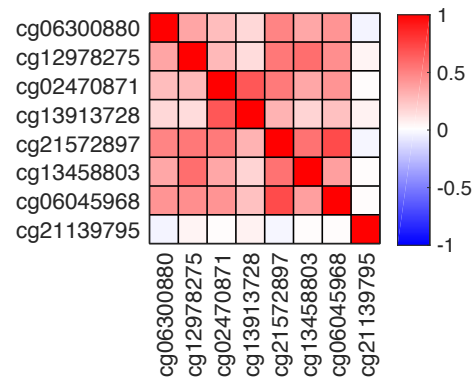

C

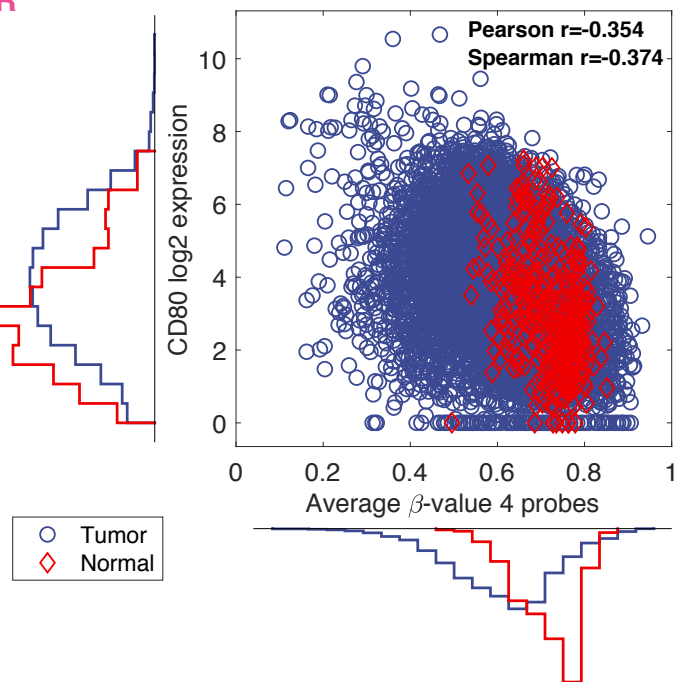

D

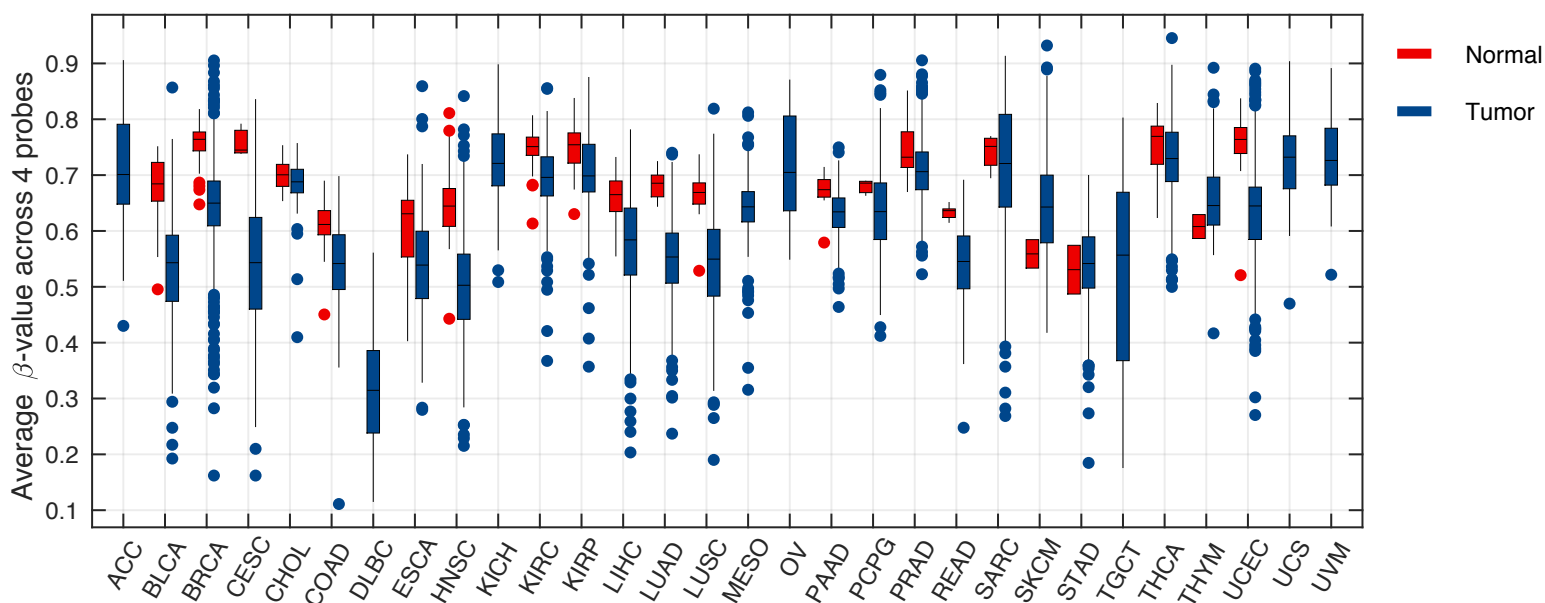

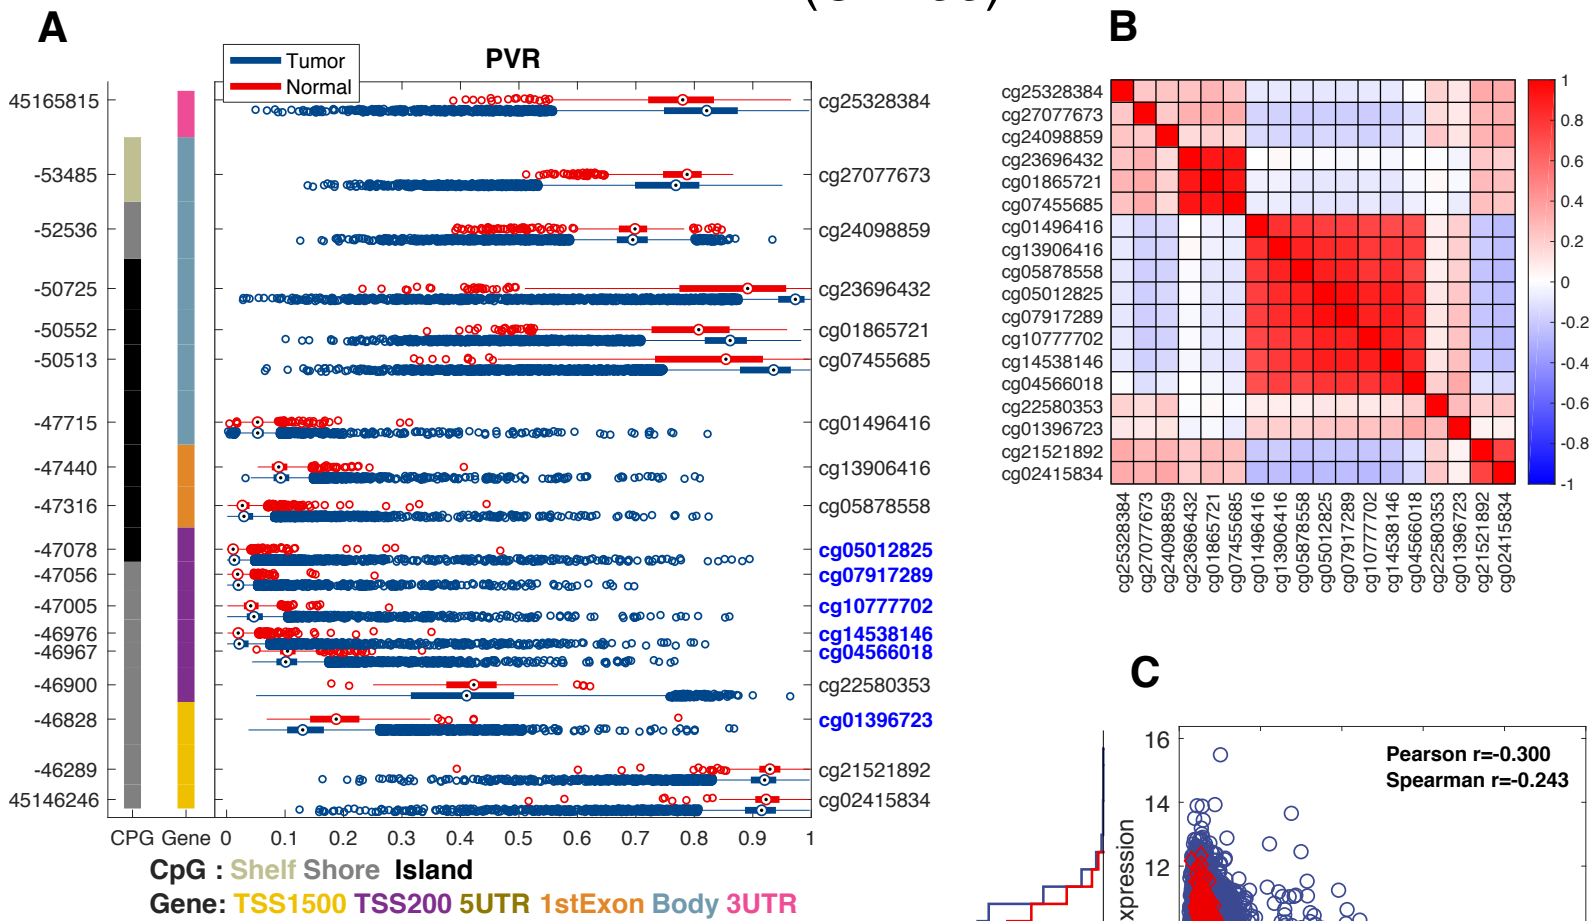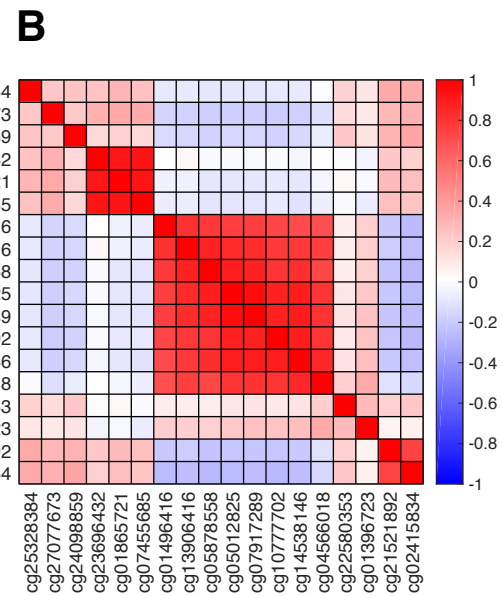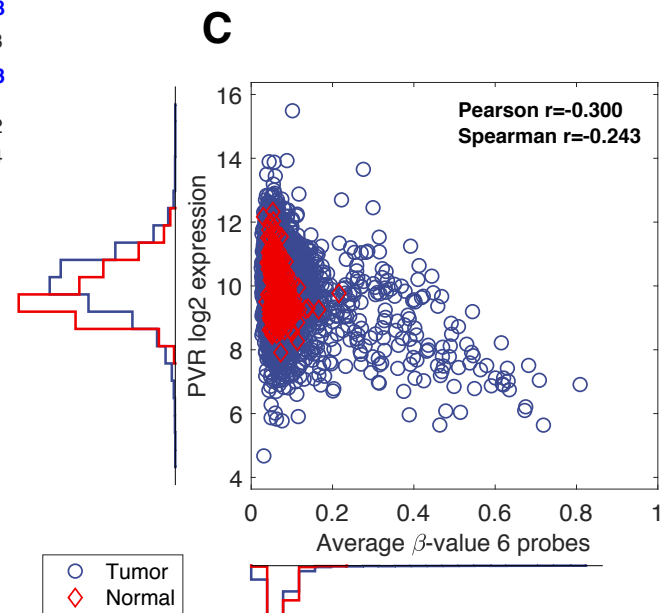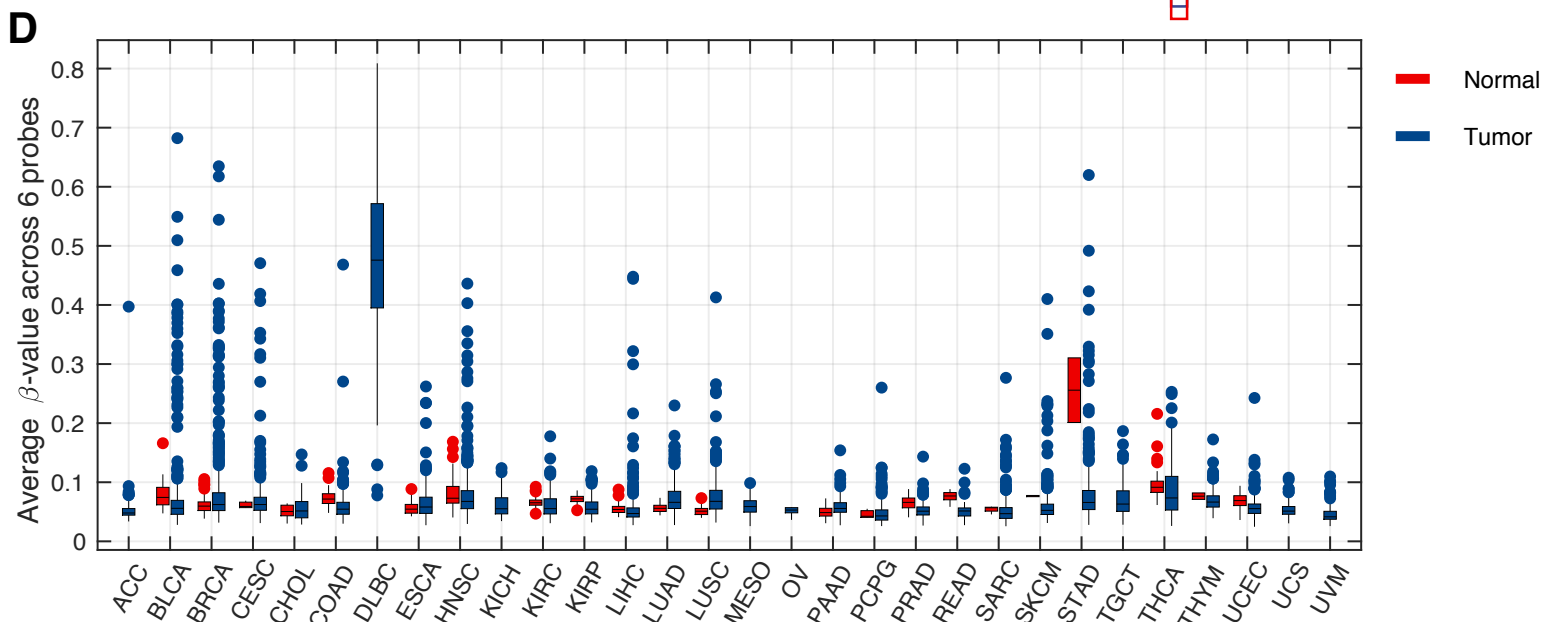

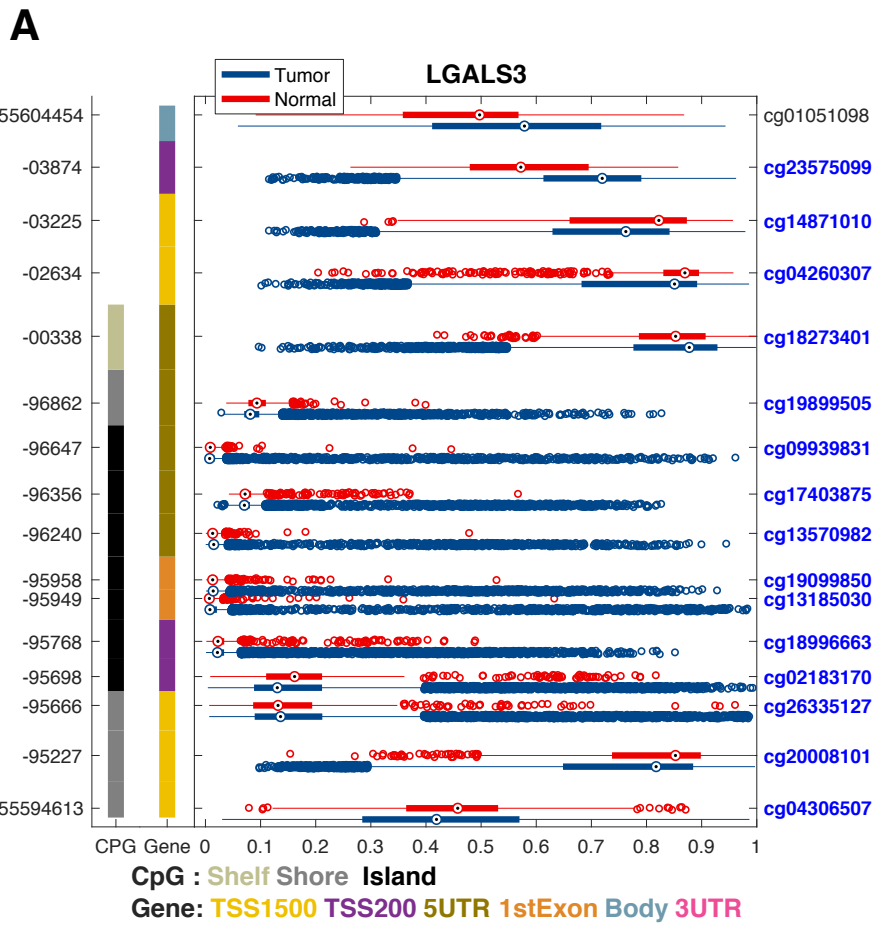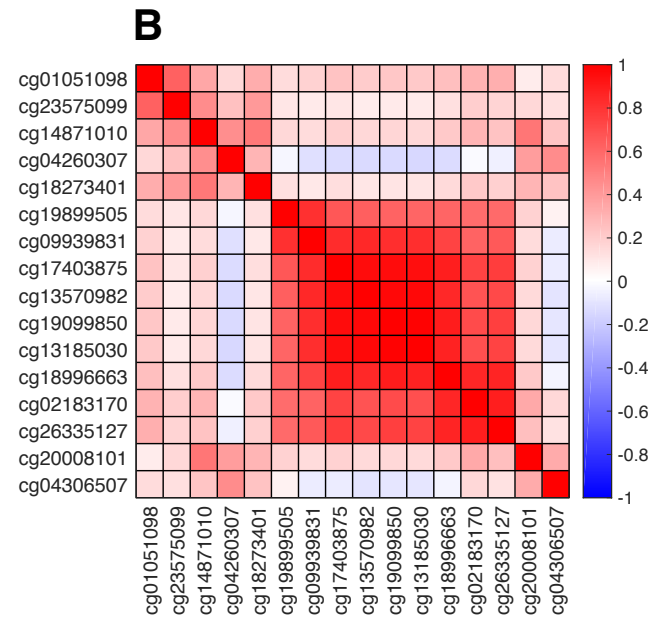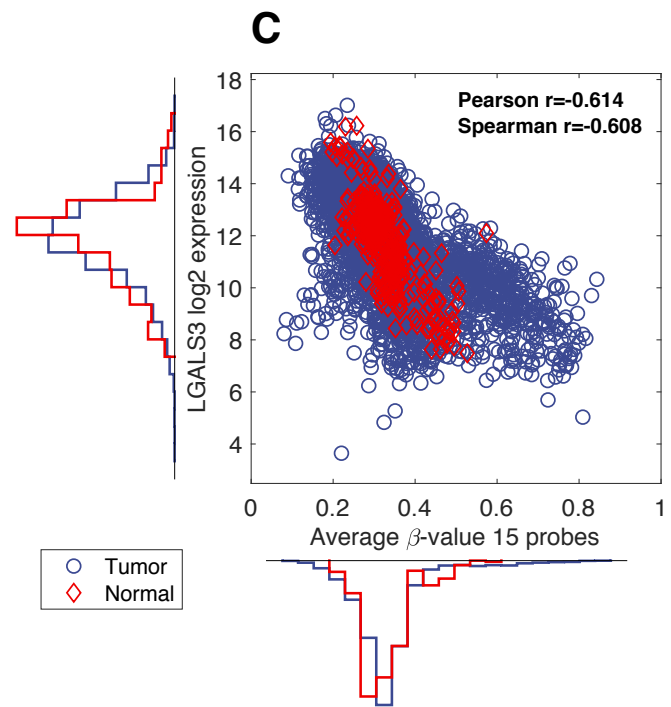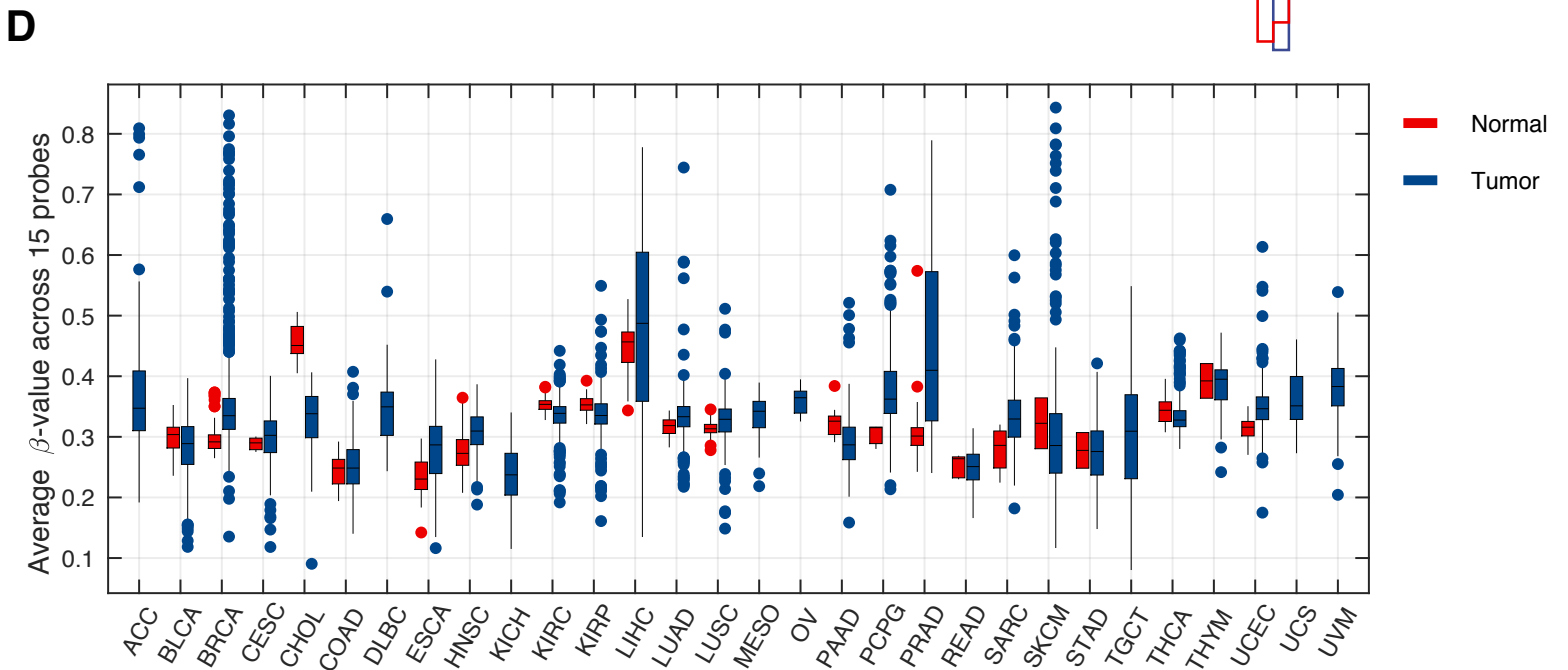

## TNFSF14 (LIGHT)

A

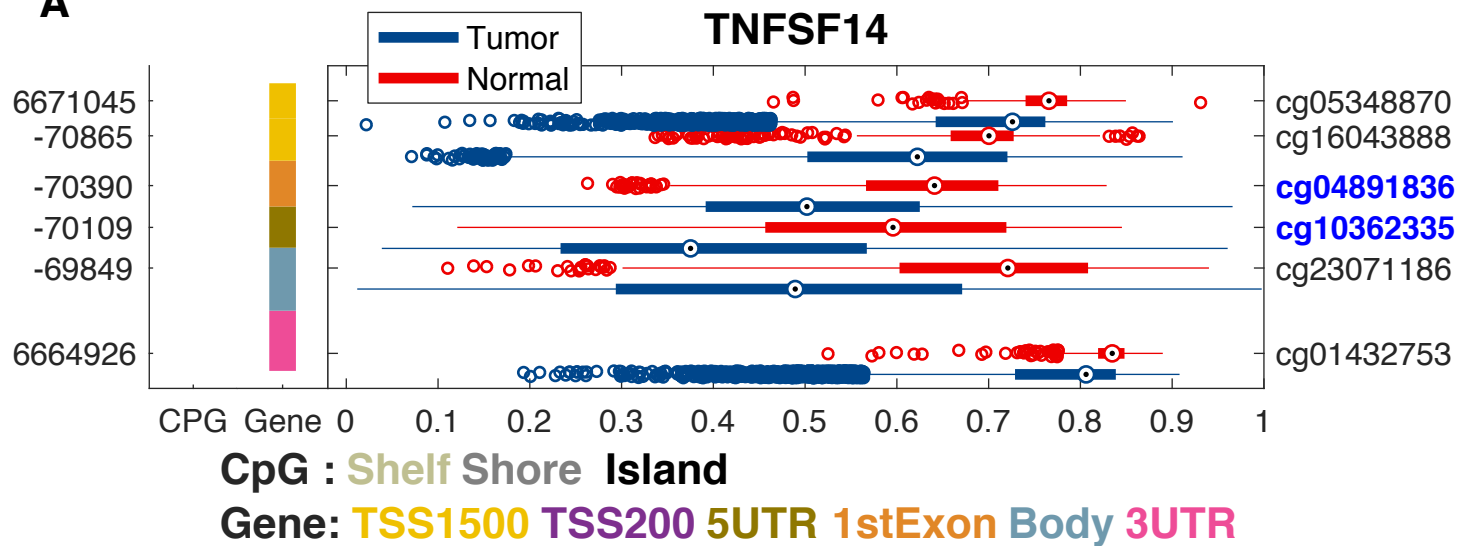

B

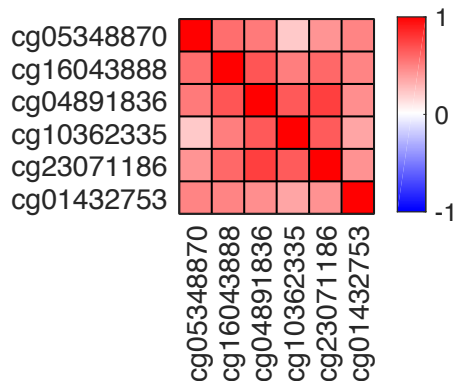

C

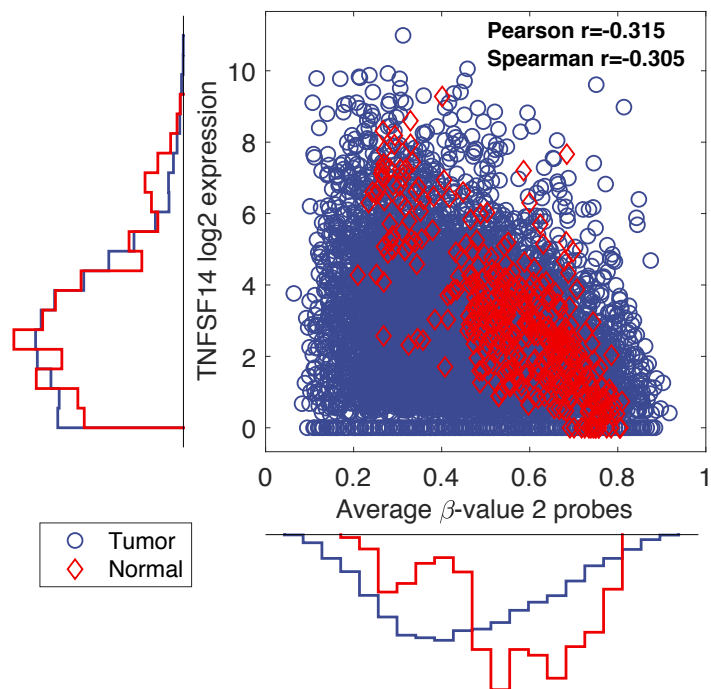

D

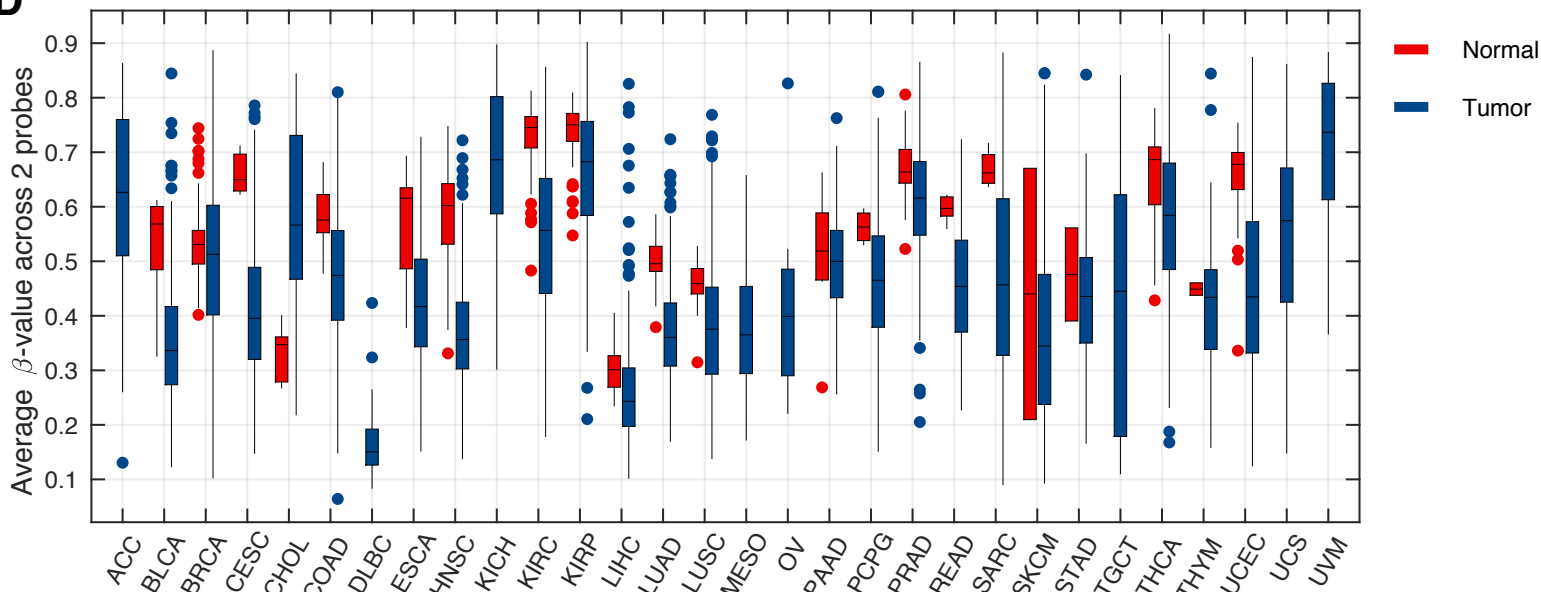

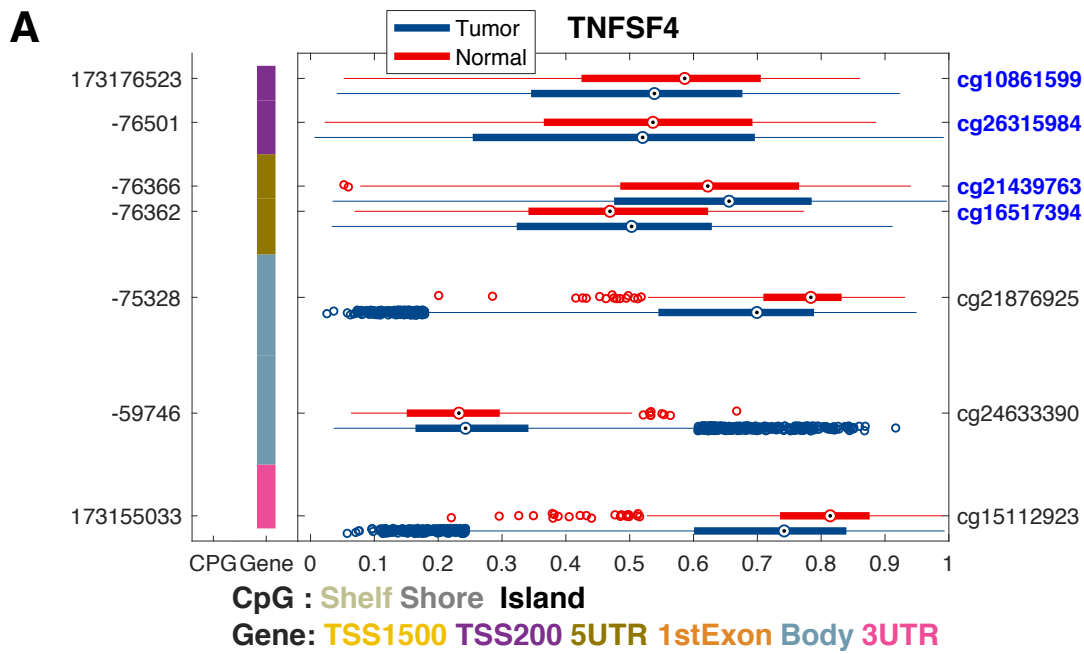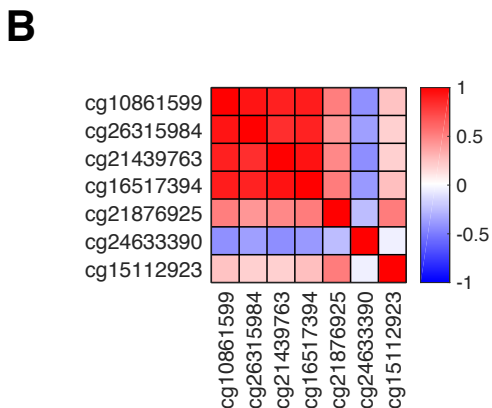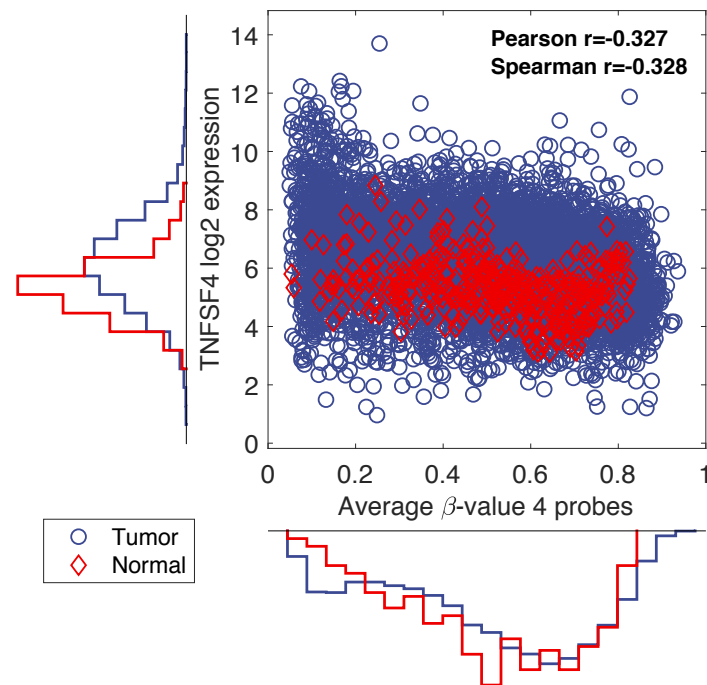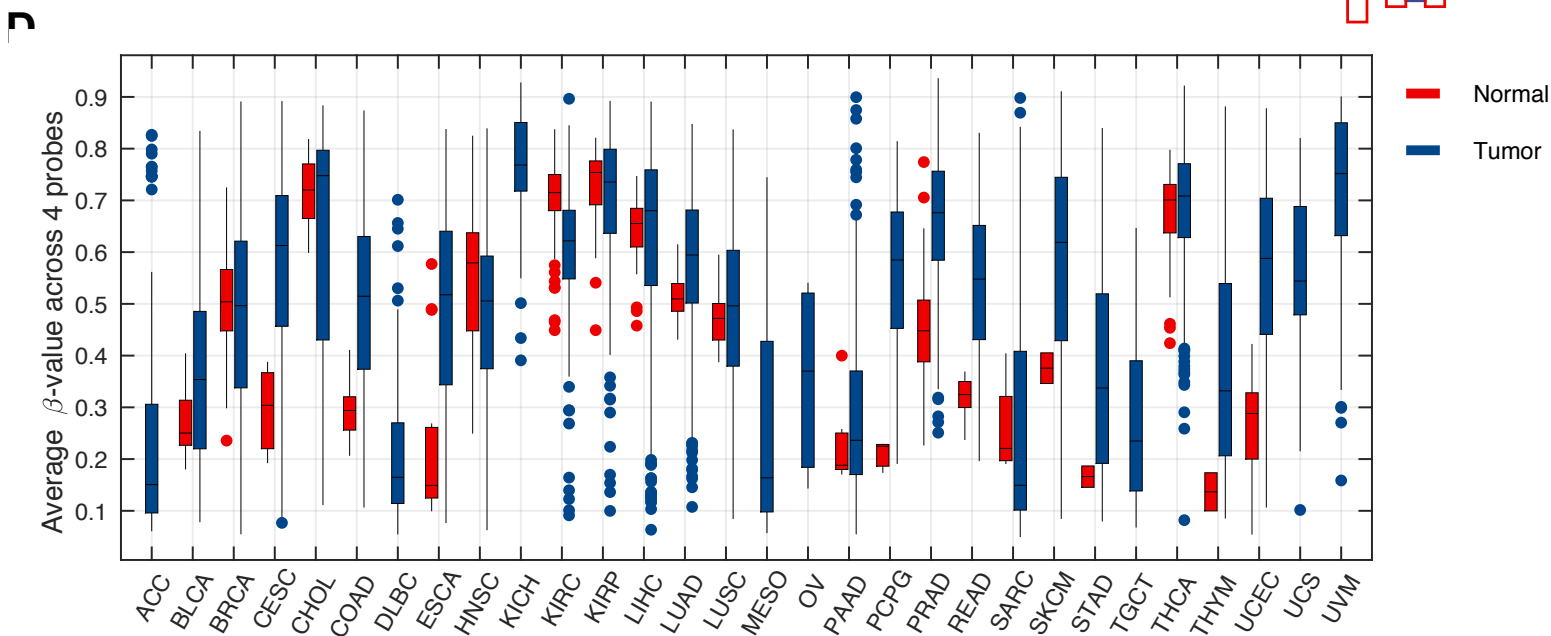



**A**

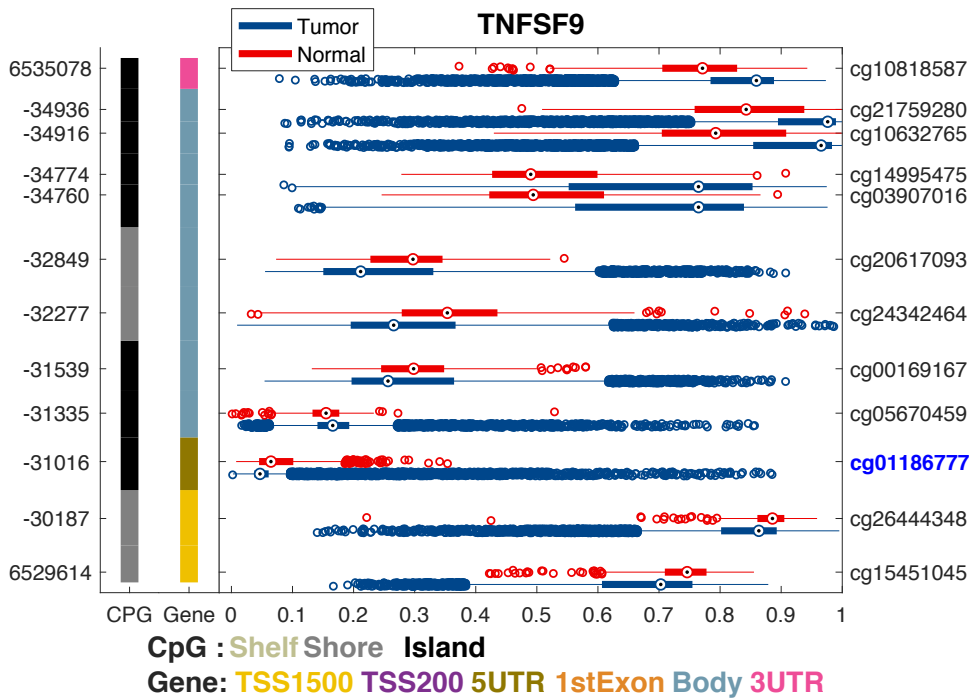

**B**

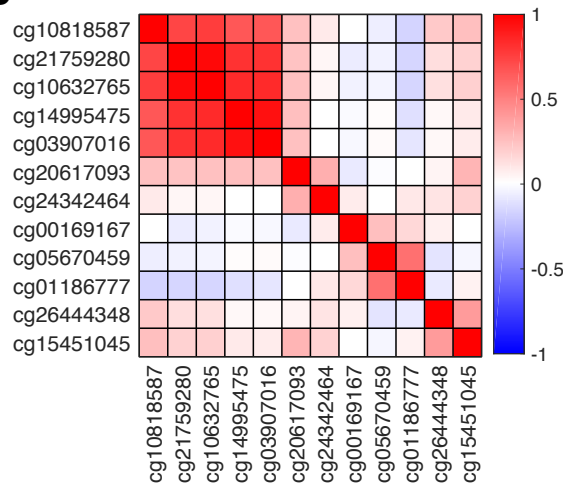

**C**

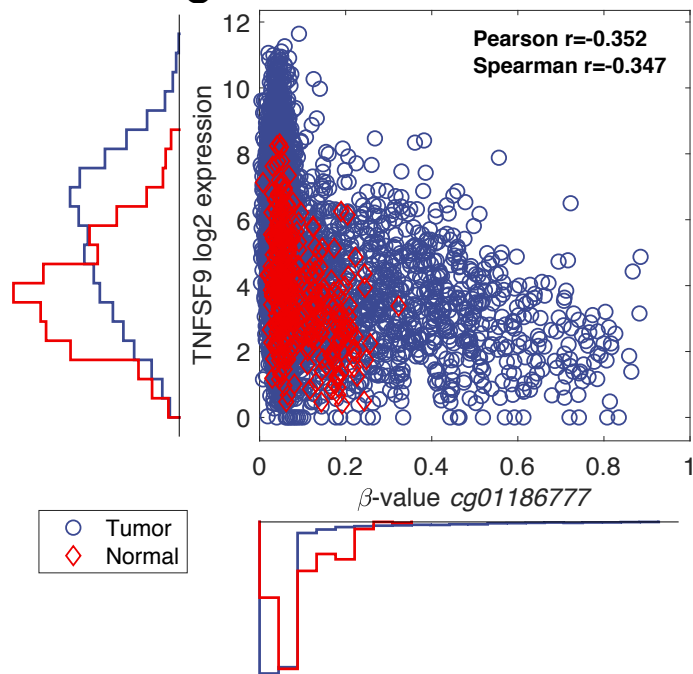

**D**

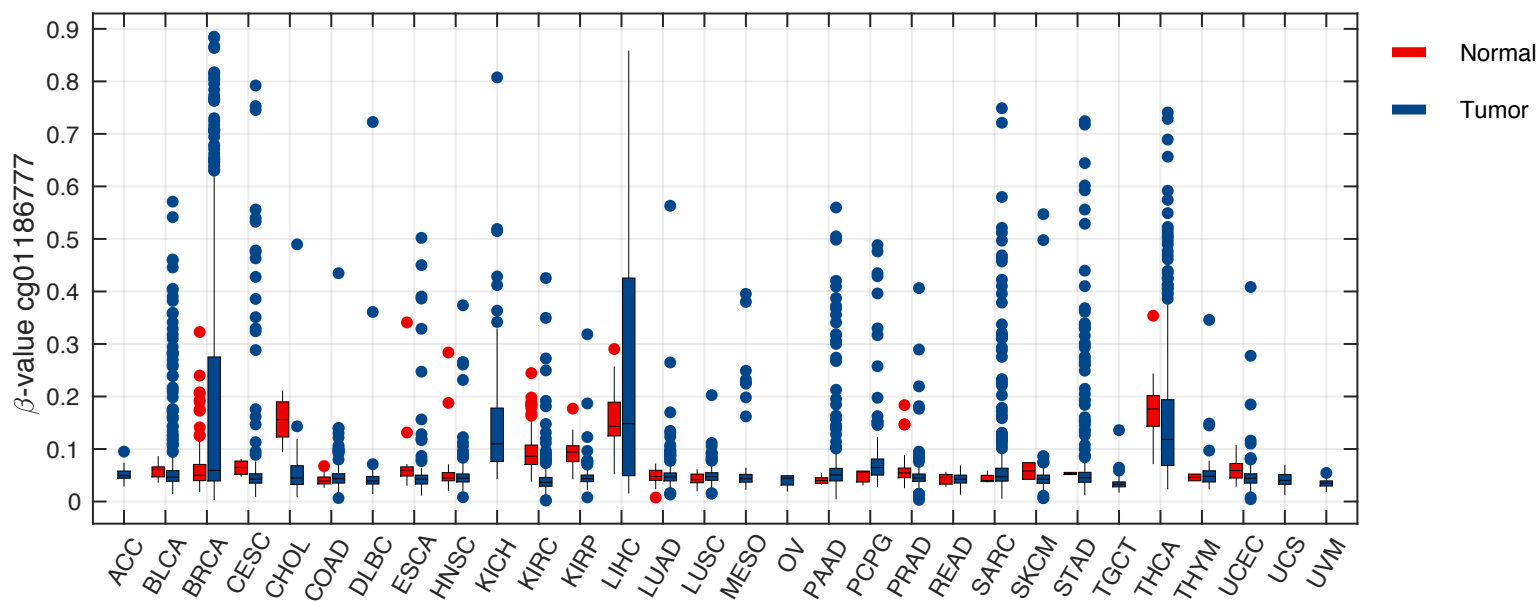

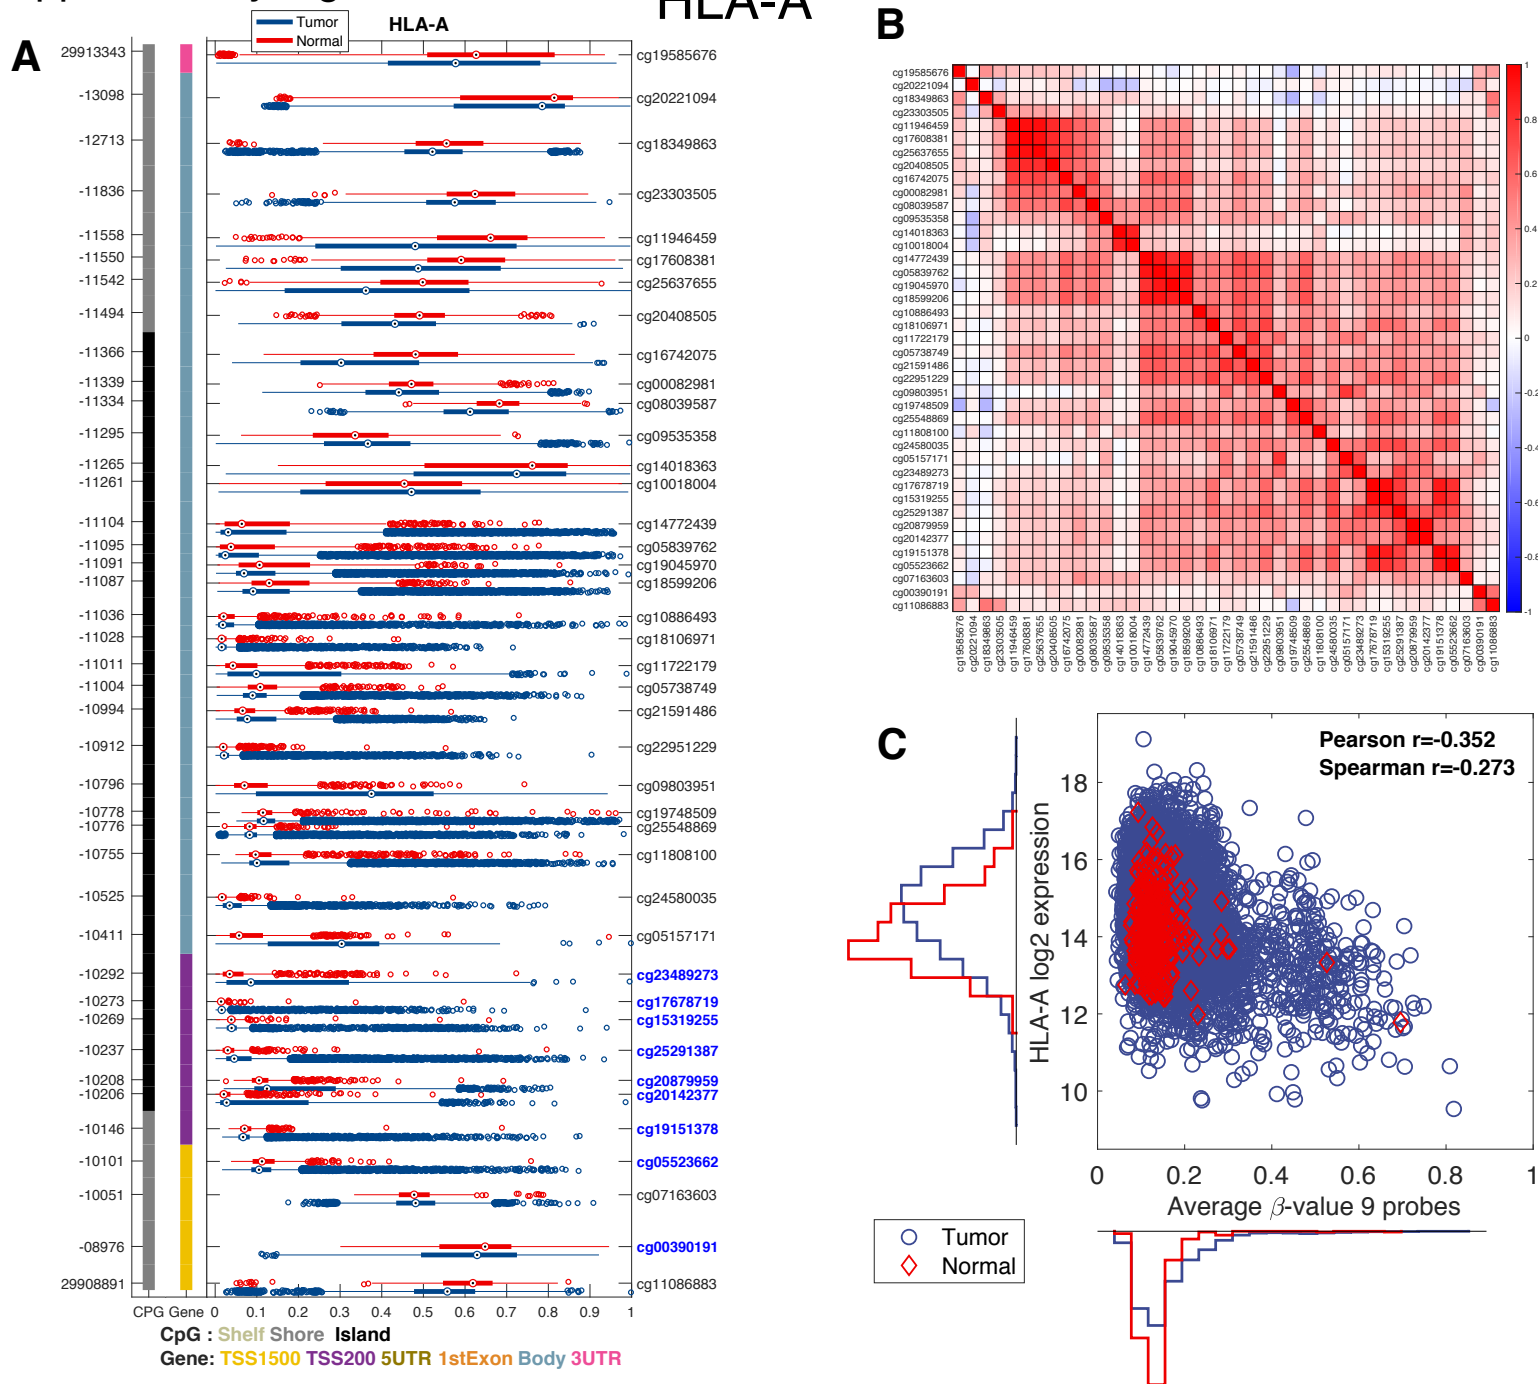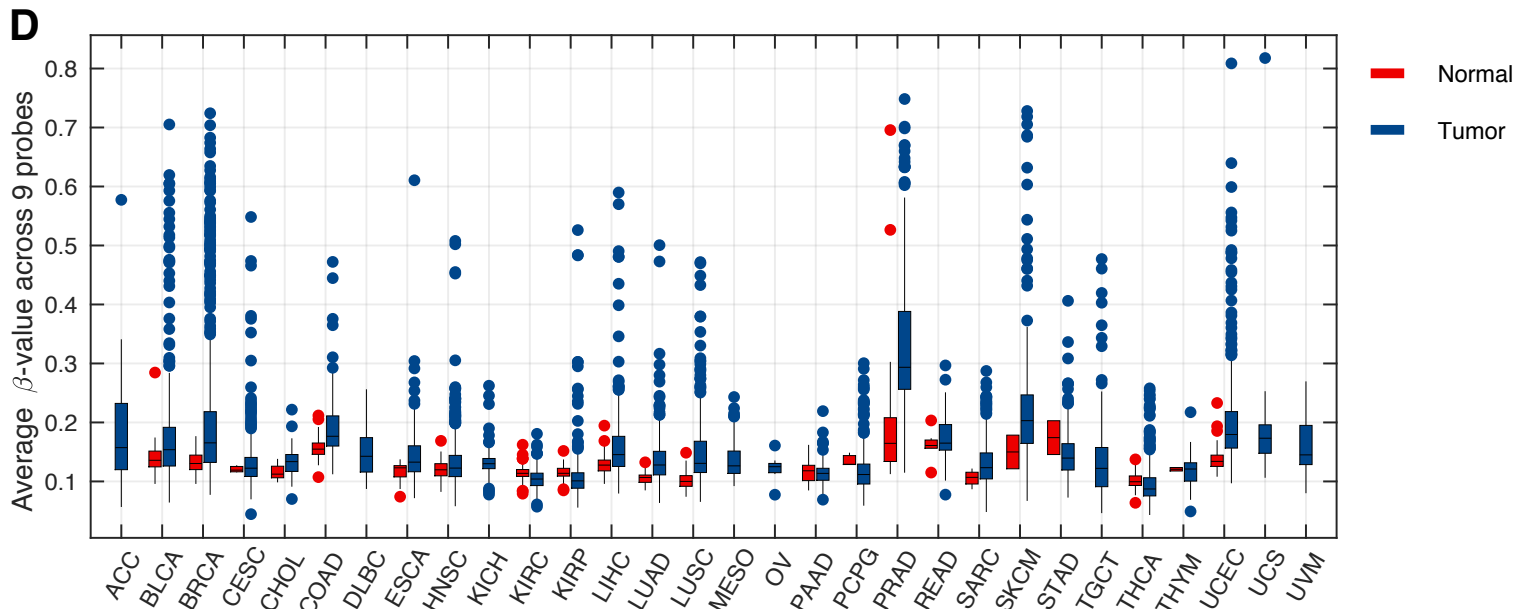

# Supplementary Figure 17

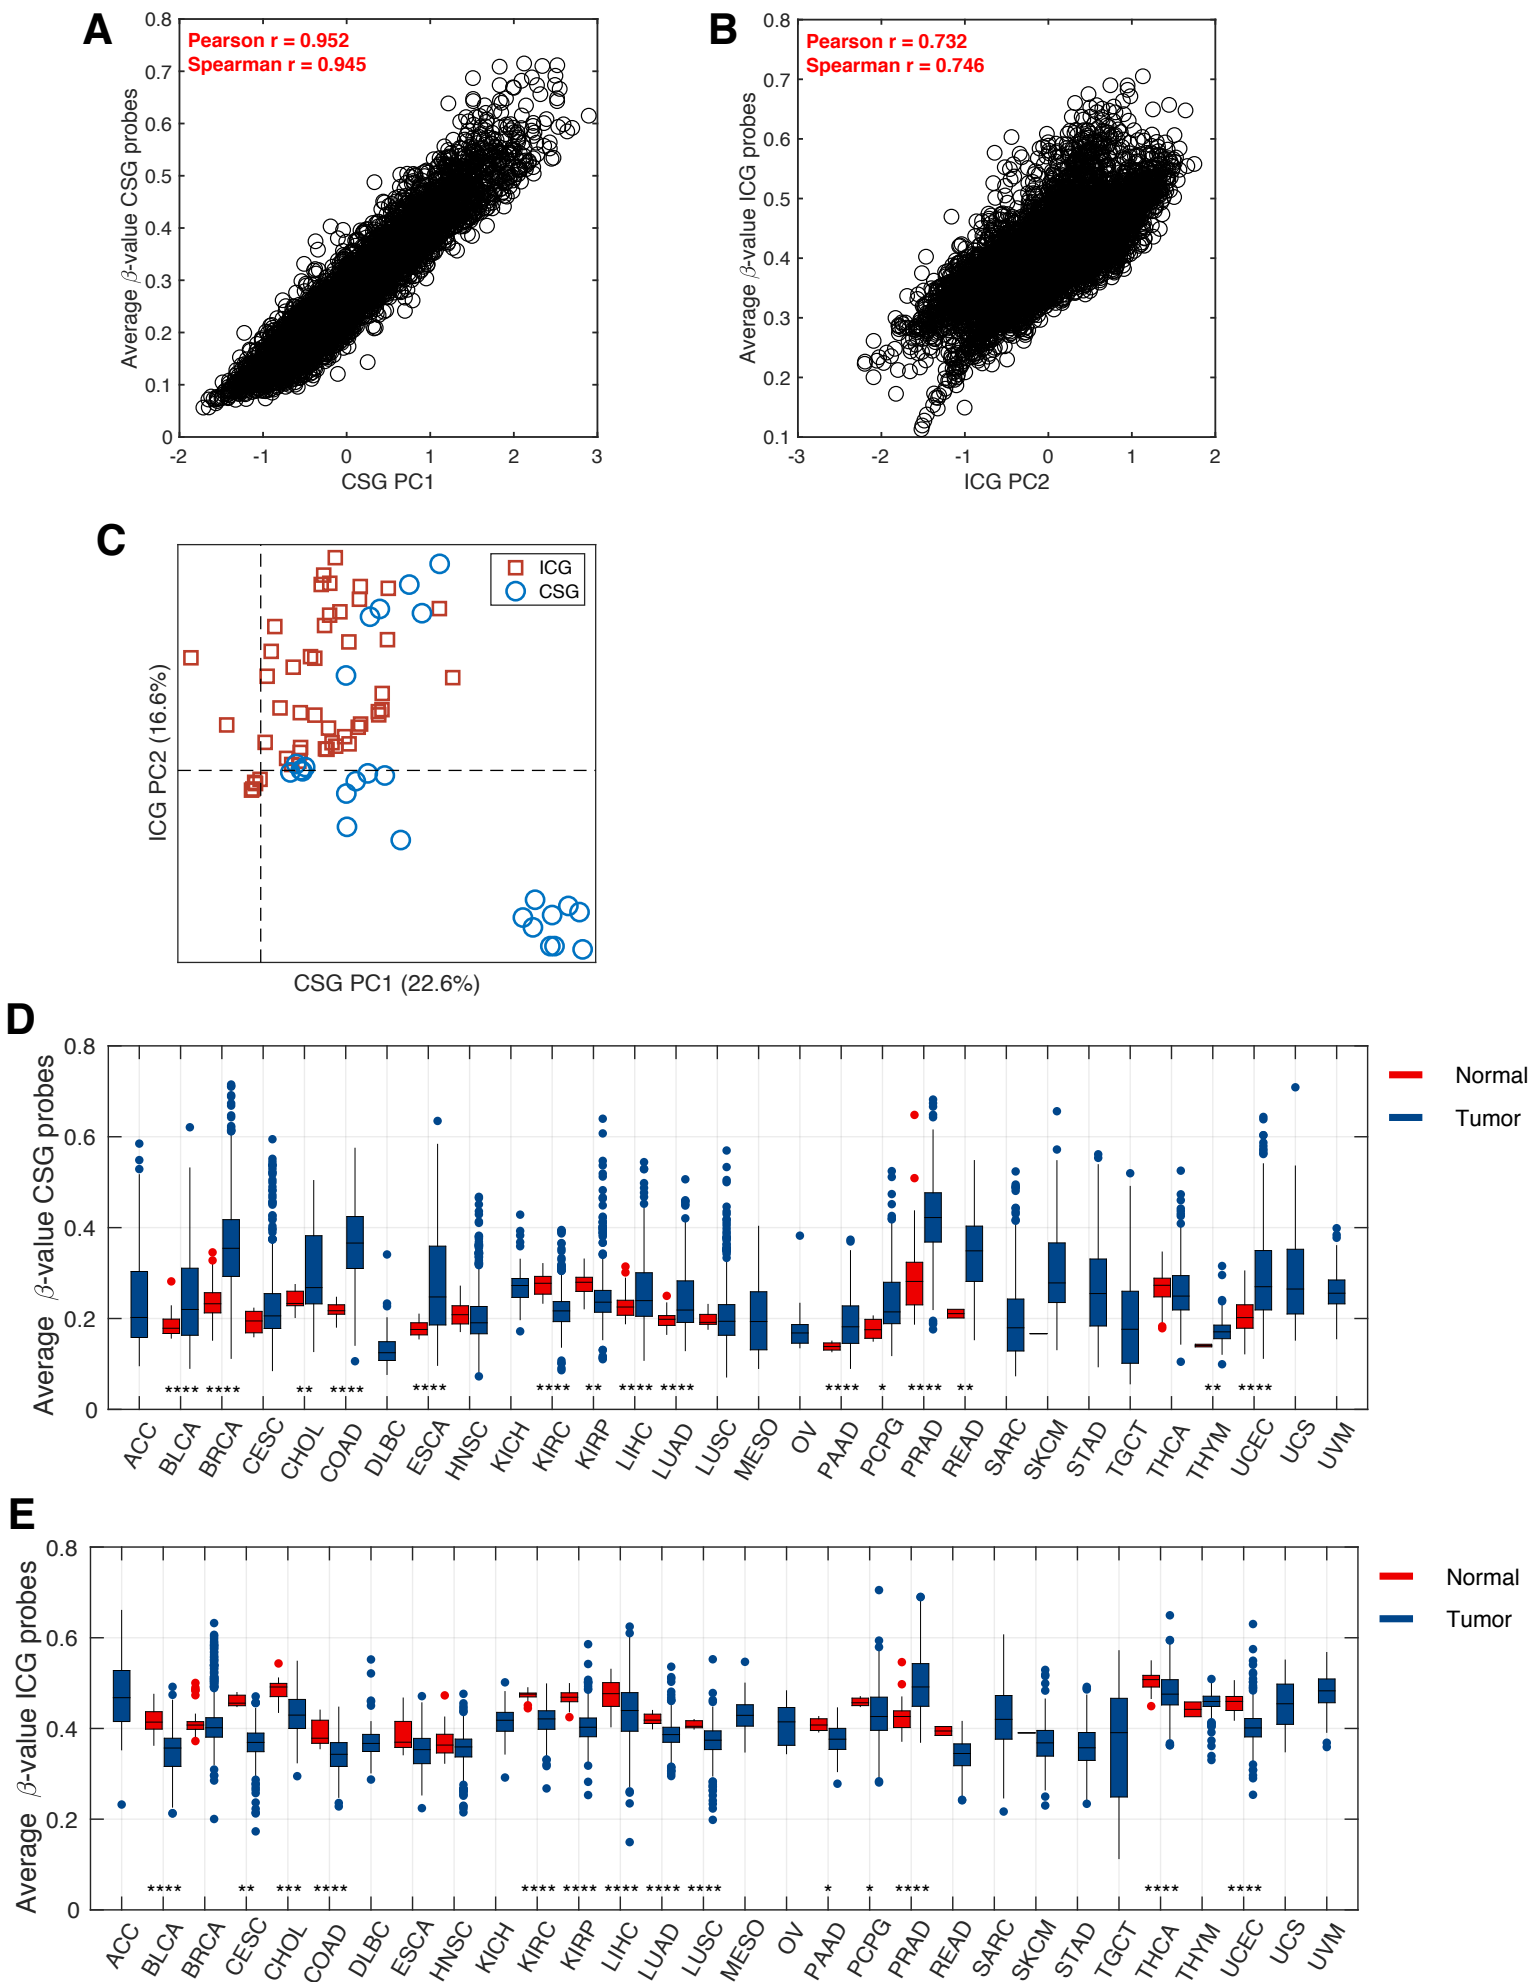

Supplementary Figure 18

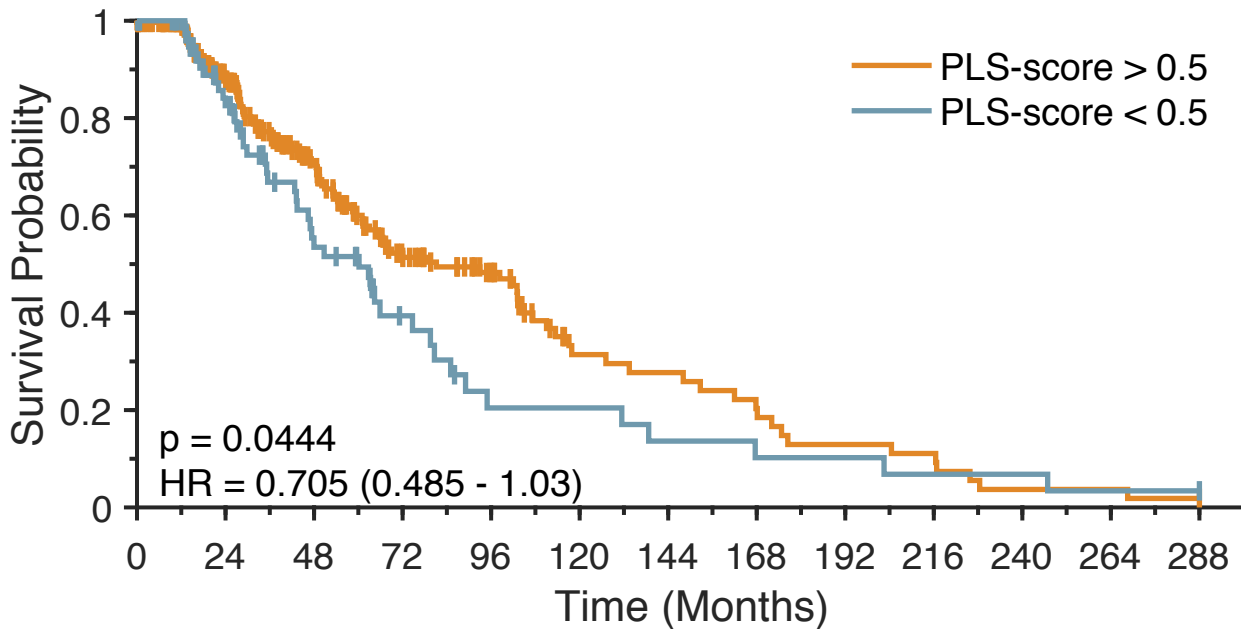

|                           |     |     |     |    |    |    |    |    |   |   |   |   |   |
|---------------------------|-----|-----|-----|----|----|----|----|----|---|---|---|---|---|
| <b>PLS-Score &gt; 0.5</b> | 300 | 190 | 118 | 62 | 41 | 18 | 16 | 12 | 8 | 7 | 3 | 3 | 2 |
| <b>PLS-Score &lt; 0.5</b> | 85  | 53  | 28  | 13 | 6  | 6  | 4  | 3  | 3 | 2 | 2 | 1 | 1 |

# Supplementary Figure 19

**A**

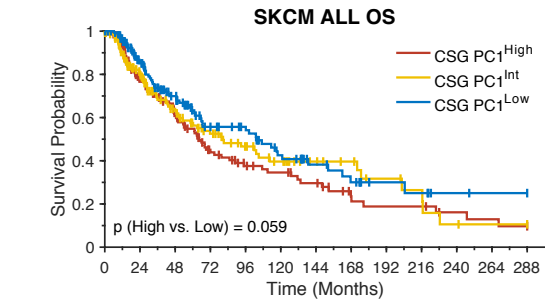

|                     |     |     |    |    |    |    |    |    |   |   |   |   |   |
|---------------------|-----|-----|----|----|----|----|----|----|---|---|---|---|---|
| PC1 <sup>High</sup> | 152 | 93  | 63 | 38 | 27 | 23 | 18 | 10 | 8 | 8 | 5 | 4 | 3 |
| PC1 <sup>Int</sup>  | 153 | 94  | 60 | 41 | 30 | 22 | 15 | 12 | 8 | 6 | 3 | 2 | 2 |
| PC1 <sup>Low</sup>  | 152 | 103 | 70 | 42 | 36 | 24 | 15 | 11 | 6 | 5 | 2 | 1 | 1 |

**B**

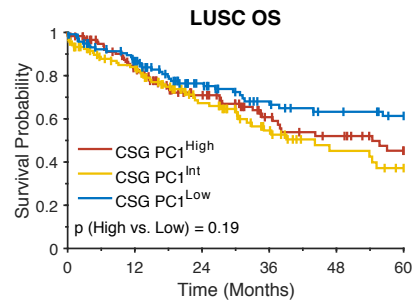

|                     |     |    |    |    |    |    |
|---------------------|-----|----|----|----|----|----|
| PC1 <sup>High</sup> | 119 | 87 | 59 | 37 | 29 | 20 |
| PC1 <sup>Int</sup>  | 119 | 88 | 51 | 29 | 17 | 12 |
| PC1 <sup>Low</sup>  | 119 | 93 | 61 | 44 | 36 | 31 |

**C**

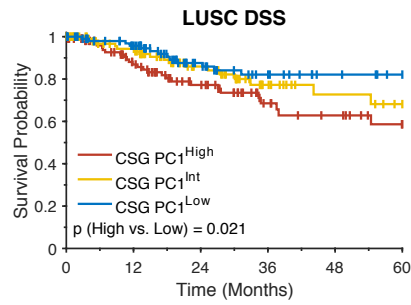

|                     |     |    |    |    |    |    |
|---------------------|-----|----|----|----|----|----|
| PC1 <sup>High</sup> | 105 | 74 | 48 | 27 | 21 | 14 |
| PC1 <sup>Int</sup>  | 105 | 79 | 47 | 24 | 16 | 12 |
| PC1 <sup>Low</sup>  | 105 | 84 | 52 | 38 | 30 | 26 |

**D**

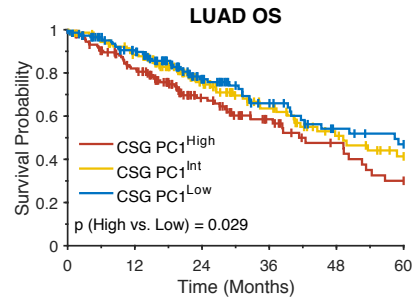

|                     |     |     |    |    |    |    |
|---------------------|-----|-----|----|----|----|----|
| PC1 <sup>High</sup> | 148 | 110 | 55 | 31 | 20 | 13 |
| PC1 <sup>Int</sup>  | 147 | 119 | 68 | 41 | 24 | 15 |
| PC1 <sup>Low</sup>  | 148 | 116 | 60 | 38 | 25 | 20 |

**E**

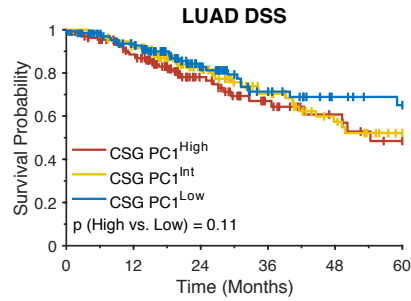

|                     |     |     |    |    |    |    |
|---------------------|-----|-----|----|----|----|----|
| PC1 <sup>High</sup> | 138 | 103 | 49 | 26 | 17 | 11 |
| PC1 <sup>Int</sup>  | 139 | 117 | 65 | 39 | 23 | 14 |
| PC1 <sup>Low</sup>  | 138 | 108 | 55 | 33 | 22 | 18 |

**F**

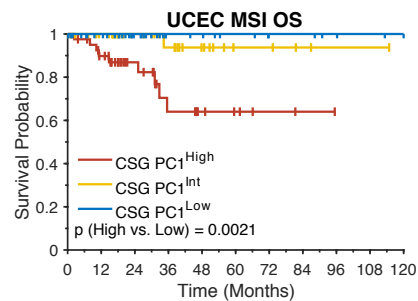

|                     |    |    |    |    |    |   |   |   |   |   |   |
|---------------------|----|----|----|----|----|---|---|---|---|---|---|
| PC1 <sup>High</sup> | 43 | 33 | 19 | 10 | 6  | 4 | 2 | 1 | 0 | 0 | 0 |
| PC1 <sup>Int</sup>  | 43 | 35 | 22 | 15 | 9  | 4 | 4 | 2 | 1 | 1 | 0 |
| PC1 <sup>Low</sup>  | 43 | 34 | 22 | 12 | 11 | 8 | 5 | 5 | 3 | 2 | 1 |

**G**

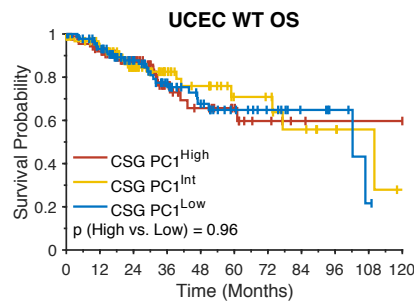

|                     |    |    |    |    |    |    |    |   |   |   |   |
|---------------------|----|----|----|----|----|----|----|---|---|---|---|
| PC1 <sup>High</sup> | 95 | 78 | 50 | 27 | 17 | 12 | 6  | 3 | 2 | 2 | 2 |
| PC1 <sup>Int</sup>  | 96 | 79 | 51 | 31 | 23 | 13 | 12 | 8 | 5 | 3 | 1 |
| PC1 <sup>Low</sup>  | 95 | 78 | 55 | 39 | 26 | 17 | 12 | 7 | 4 | 1 | 0 |

# Supplementary Figure 20

**A**

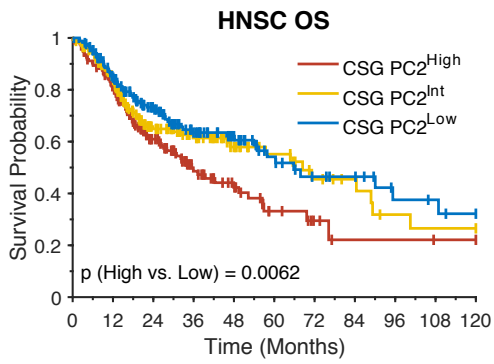

|                           |     |     |    |    |    |    |    |    |   |   |   |
|---------------------------|-----|-----|----|----|----|----|----|----|---|---|---|
| <b>PC2<sup>High</sup></b> | 172 | 130 | 73 | 37 | 23 | 10 | 5  | 2  | 2 | 1 | 1 |
| <b>PC2<sup>Int</sup></b>  | 171 | 135 | 73 | 49 | 30 | 20 | 13 | 10 | 6 | 5 | 5 |
| <b>PC2<sup>Low</sup></b>  | 172 | 132 | 83 | 56 | 41 | 23 | 16 | 14 | 8 | 7 | 5 |

**B**

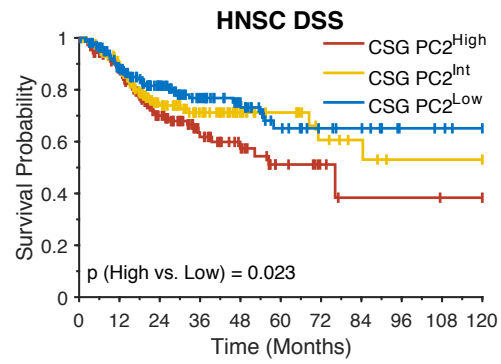

|                           |     |     |    |    |    |    |    |    |   |   |   |
|---------------------------|-----|-----|----|----|----|----|----|----|---|---|---|
| <b>PC2<sup>High</sup></b> | 163 | 126 | 72 | 37 | 23 | 10 | 5  | 2  | 2 | 1 | 1 |
| <b>PC2<sup>Int</sup></b>  | 164 | 132 | 70 | 46 | 27 | 18 | 11 | 8  | 5 | 5 | 5 |
| <b>PC2<sup>Low</sup></b>  | 163 | 124 | 79 | 55 | 40 | 22 | 16 | 14 | 8 | 7 | 5 |

**C**

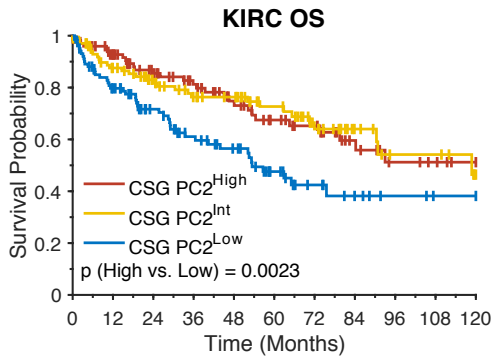

|                           |     |    |    |    |    |    |    |    |    |    |   |
|---------------------------|-----|----|----|----|----|----|----|----|----|----|---|
| <b>PC2<sup>High</sup></b> | 104 | 84 | 67 | 56 | 44 | 33 | 28 | 17 | 11 | 9  | 6 |
| <b>PC2<sup>Int</sup></b>  | 104 | 81 | 66 | 55 | 51 | 39 | 27 | 16 | 10 | 10 | 5 |
| <b>PC2<sup>Low</sup></b>  | 104 | 74 | 56 | 42 | 34 | 21 | 12 | 7  | 4  | 2  | 2 |

**D**

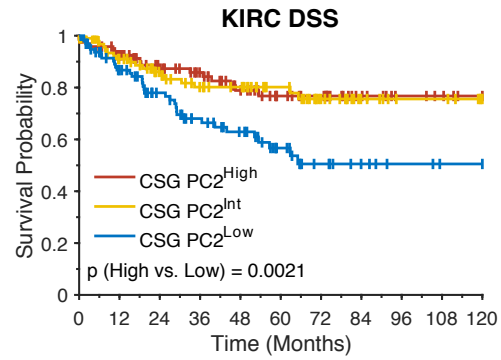

|                           |     |    |    |    |    |    |    |    |    |    |   |
|---------------------------|-----|----|----|----|----|----|----|----|----|----|---|
| <b>PC2<sup>High</sup></b> | 101 | 81 | 65 | 55 | 43 | 32 | 28 | 17 | 11 | 9  | 6 |
| <b>PC2<sup>Int</sup></b>  | 101 | 78 | 62 | 52 | 48 | 37 | 25 | 15 | 10 | 10 | 5 |
| <b>PC2<sup>Low</sup></b>  | 101 | 73 | 56 | 42 | 34 | 21 | 12 | 7  | 4  | 2  | 2 |

**E**

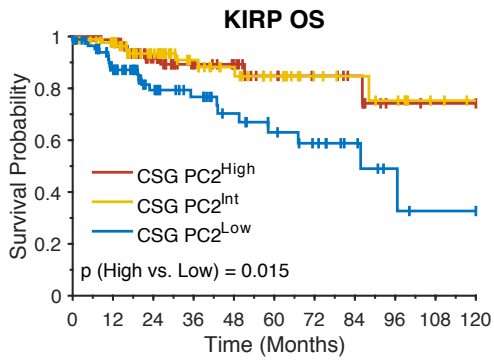

|                           |    |    |    |    |    |    |    |    |   |   |   |
|---------------------------|----|----|----|----|----|----|----|----|---|---|---|
| <b>PC2<sup>High</sup></b> | 90 | 79 | 45 | 29 | 23 | 15 | 11 | 8  | 2 | 1 | 1 |
| <b>PC2<sup>Int</sup></b>  | 90 | 77 | 53 | 34 | 26 | 19 | 12 | 10 | 8 | 3 | 1 |
| <b>PC2<sup>Low</sup></b>  | 90 | 64 | 39 | 30 | 22 | 17 | 13 | 8  | 4 | 2 | 2 |

**F**

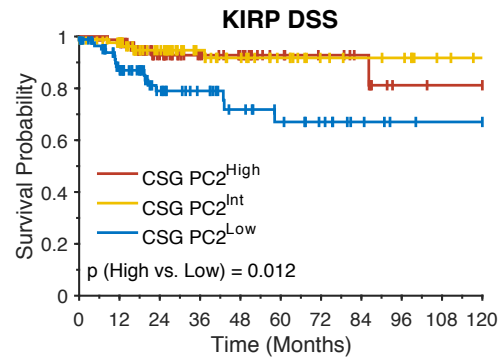

|                           |    |    |    |    |    |    |    |   |   |   |   |
|---------------------------|----|----|----|----|----|----|----|---|---|---|---|
| <b>PC2<sup>High</sup></b> | 89 | 78 | 44 | 29 | 23 | 15 | 11 | 8 | 2 | 1 | 1 |
| <b>PC2<sup>Int</sup></b>  | 88 | 75 | 52 | 33 | 25 | 18 | 11 | 9 | 8 | 3 | 1 |
| <b>PC2<sup>Low</sup></b>  | 89 | 63 | 37 | 28 | 20 | 15 | 11 | 6 | 3 | 2 | 2 |
